# Supplementary material for: Transcriptomic Changes in Mouse Bone Marrow-Derived Macrophages Exposed to Neuropeptide FF
Source: MDPI journal article supplement (doi:10.3390/genes12050705), 2021-05-09
Supplement: s1 [file s1]

---

**Table S12.** Average value of RMSD, RMSF, and Rg

---

| Protein | RMSD   | RMSF   | Rg    |
|---------|--------|--------|-------|
| CNR2    | 0.5307 | 0.2949 | 2.393 |
| GPR55   | 2.074  | 0.9451 | 3.214 |
| GPR18   | 0.7873 | 0.3580 | 2.167 |
| HCAR2   | 1.137  | 0.3893 | 2.274 |
| GPR31B  | 0.9397 | 0.5039 | 2.261 |
| GPR183  | 0.6548 | 0.2814 | 2.100 |
| OAS2    | 1.767  | 0.5474 | 3.516 |
| DHX58   | 0.4979 | 0.2520 | 2.768 |

---
