# Supplementary material for: Transcriptomic Changes in Mouse Bone Marrow-Derived Macrophages Exposed to Neuropeptide FF
Source: MDPI journal article supplement (doi:10.3390/genes12050705), 2021-05-09
Supplement: s1 [file s1]

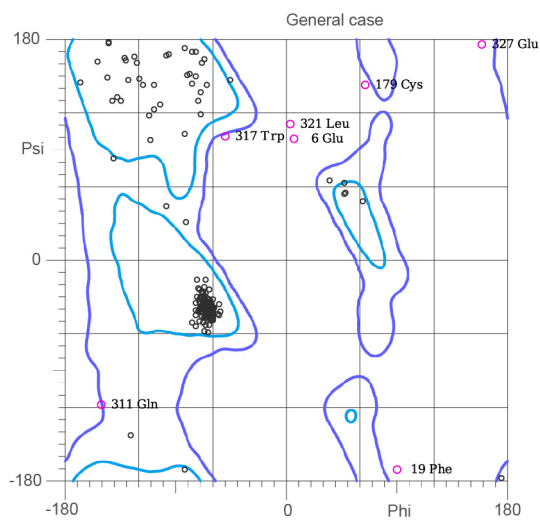

CNR2

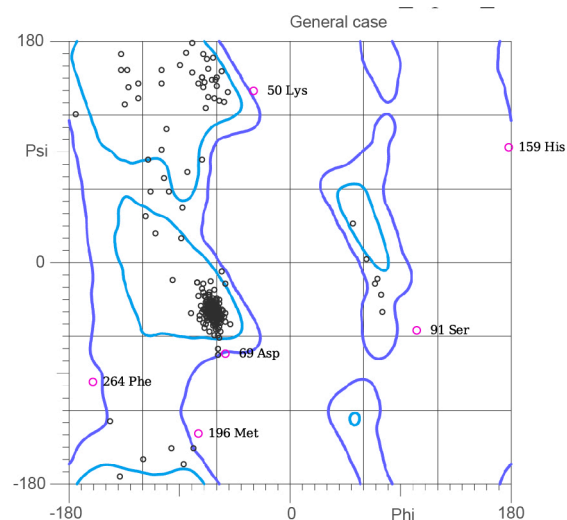

GPR55

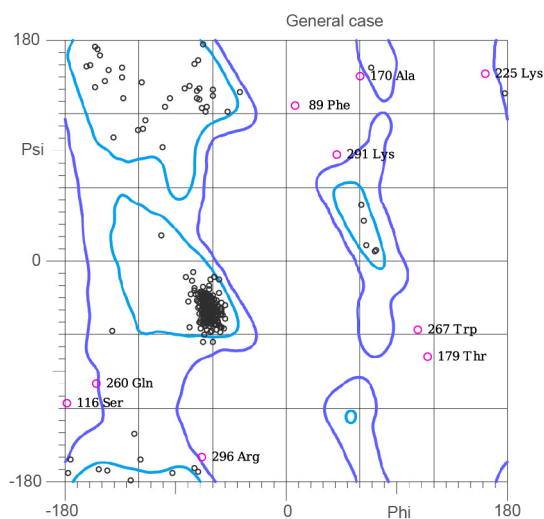

GPR18

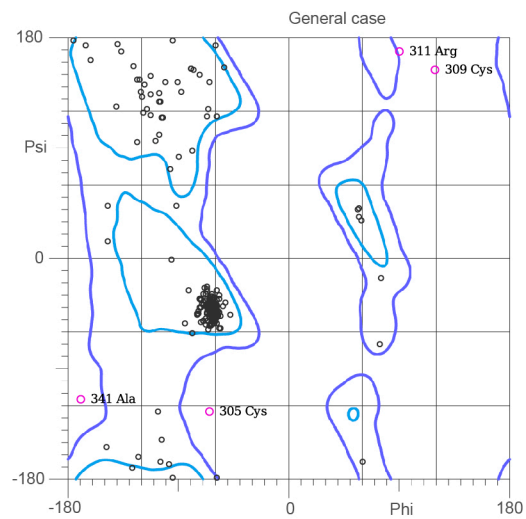

HCAR2

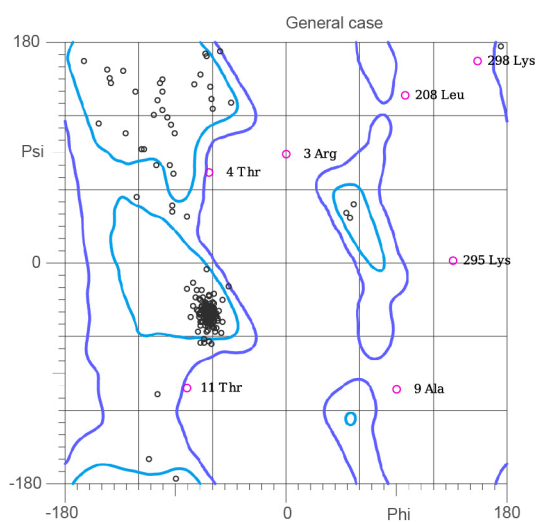

GPR31B

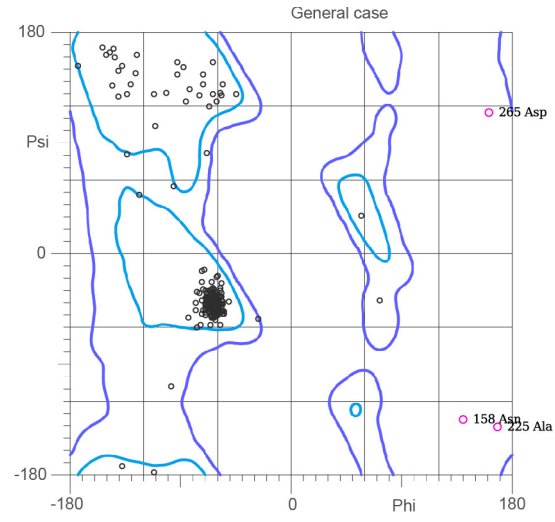

GPR183

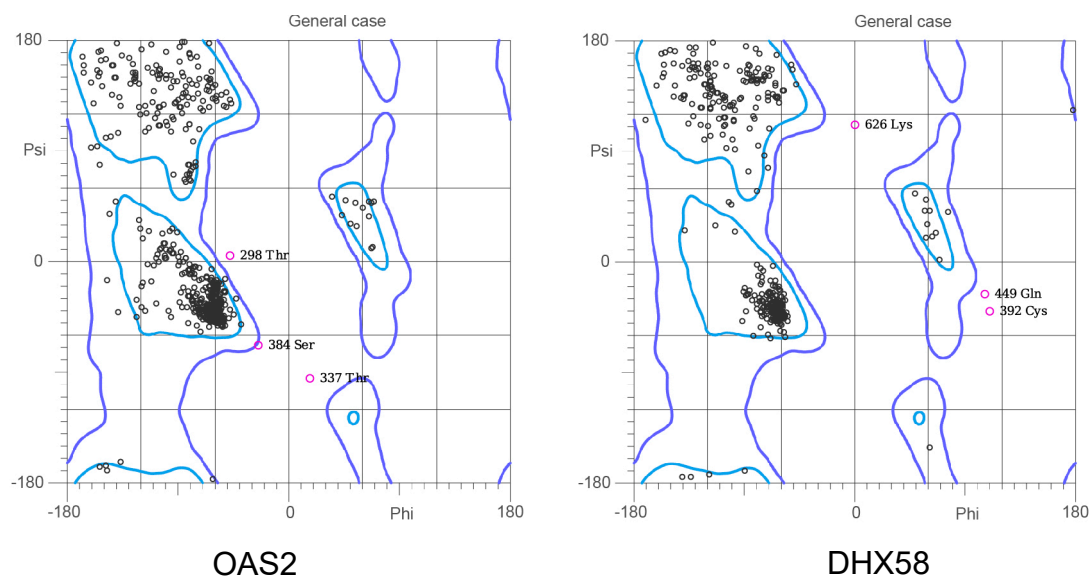

**Figure S4.** Ramachandran analysis of the Modeller-generated models of hub proteins (CNR2, GPR55, GPR18, HCAR2, GPR31B, GPR183, OAS2, and DHX58). The different colored areas: ‘most favored’ (light blue), ‘generously allowed’ (blue), and ‘disallowed’ (violet).
