# Supplementary material for: Transcriptomic Changes in Mouse Bone Marrow-Derived Macrophages Exposed to Neuropeptide FF
Source: MDPI journal article supplement (doi:10.3390/genes12050705), 2021-05-09
Supplement: s1 [file s1]

**Table S2.** Details of DEGs-protein\_coding (up-regulated and down-regulated  
24 protein\_coding genes were shown)

| Gene_symbol     | log2FoldChange | Padj        | Gene_chromosome | Change |
|-----------------|----------------|-------------|-----------------|--------|
| <i>Gabbr2</i>   | -8.295323959   | 1.68E-10    | 4               | Down   |
| <i>Slco2b1</i>  | -6.877748635   | 6.15E-14    | 7               | Down   |
| <i>Gprc5c</i>   | -6.19472407    | 3.13E-14    | 11              | Down   |
| <i>Tgfb3</i>    | -6.093676657   | 5.35E-05    | 12              | Down   |
| <i>Zbtb16</i>   | -6.046195216   | 1.41E-09    | 9               | Down   |
| <i>Dkk2</i>     | -5.958083038   | 2.64E-13    | 3               | Down   |
| <i>Myadml2</i>  | -5.257189141   | 0.003465987 | 11              | Down   |
| <i>Hpgd</i>     | -5.12511186    | 9.48E-34    | 8               | Down   |
| <i>Yipf7</i>    | -5.058485274   | 0.003829747 | 5               | Down   |
| <i>Gpr34</i>    | -5.054495243   | 4.86E-05    | X               | Down   |
| <i>Nanos1</i>   | -5.005114351   | 8.82E-11    | 19              | Down   |
| <i>Cd300lg</i>  | -4.994420895   | 0.009171368 | 11              | Down   |
| <i>Arhgap32</i> | -4.925683387   | 0.00013605  | 9               | Down   |
| <i>Siglec15</i> | -4.900925577   | 0.021239298 | 18              | Down   |
| <i>Hmga2</i>    | -4.887729528   | 4.54E-48    | 10              | Down   |
| <i>Cfap161</i>  | -4.836257651   | 0.008292963 | 7               | Down   |
| <i>Pde1c</i>    | -4.836199321   | 0.000241315 | 6               | Down   |
| <i>Tox2</i>     | -4.774848185   | 4.51E-59    | 2               | Down   |
| <i>Chst3</i>    | -4.679708581   | 1.45E-12    | 10              | Down   |
| <i>Rtn4rl1</i>  | -4.659066204   | 1.11E-05    | 11              | Down   |
| <i>Rnf150</i>   | -4.543777816   | 6.24E-109   | 8               | Down   |
| <i>Sox4</i>     | -4.516426906   | 4.28E-11    | 13              | Down   |
| <i>Slc16a14</i> | -4.473892336   | 0.023983569 | 1               | Down   |
| <i>Mrap</i>     | -4.471313135   | 0.024001949 | 16              | Down   |
| <i>Saa3</i>     | 11.18204747    | 3.66E-190   | 7               | Up     |
| <i>Cfb</i>      | 10.96168234    | 1.69E-17    | 17              | Up     |
| <i>Lad1</i>     | 10.51630095    | 2.70E-17    | 1               | Up     |
| <i>Nos2</i>     | 10.31126139    | 9.84E-16    | 11              | Up     |
| <i>Zfp811</i>   | 10.05127524    | 1.18E-15    | 17              | Up     |
| <i>Susd2</i>    | 9.706574036    | 6.84E-45    | 10              | Up     |
| <i>Acod1</i>    | 9.459532943    | 0           | 14              | Up     |
| <i>Cxcl3</i>    | 9.435925205    | 2.01E-101   | 5               | Up     |
| <i>Csf3</i>     | 9.016380572    | 1.65E-12    | 11              | Up     |
| <i>Ccl5</i>     | 8.965357213    | 7.55E-154   | 11              | Up     |
| <i>Lcn2</i>     | 8.847988836    | 4.76E-69    | 2               | Up     |
| <i>Cxcl10</i>   | 8.402048341    | 2.42E-107   | 5               | Up     |
| <i>Il6</i>      | 8.390286243    | 1.20E-10    | 5               | Up     |
| <i>Fpr1</i>     | 8.230297765    | 3.37E-176   | 17              | Up     |
| <i>Fpr2</i>     | 8.133897304    | 1.03E-183   | 17              | Up     |
| <i>Marco</i>    | 8.022149335    | 8.38E-203   | 1               | Up     |
| <i>Apol9b</i>   | 7.949950375    | 2.45E-12    | 15              | Up     |
| <i>Cd38</i>     | 7.904286175    | 5.13E-91    | 5               | Up     |
| <i>Rasgrp1</i>  | 7.899061259    | 1.86E-56    | 2               | Up     |
| <i>Gfi1</i>     | 7.700044001    | 5.84E-12    | 5               | Up     |

|               |             |          |    |    |
|---------------|-------------|----------|----|----|
| <i>Fpr3</i>   | 7.698803818 | 1.21E-08 | 17 | Up |
| <i>Clec4e</i> | 7.675562787 | 0        | 6  | Up |
| <i>Cxcl1</i>  | 7.670454709 | 5.16E-70 | 5  | Up |
| <i>Pde10a</i> | 7.660679317 | 2.73E-08 | 17 | Up |
