# Supplementary material for: Transcriptomic Changes in Mouse Bone Marrow-Derived Macrophages Exposed to Neuropeptide FF
Source: MDPI journal article supplement (doi:10.3390/genes12050705), 2021-05-09
Supplement: s1 [file s1]

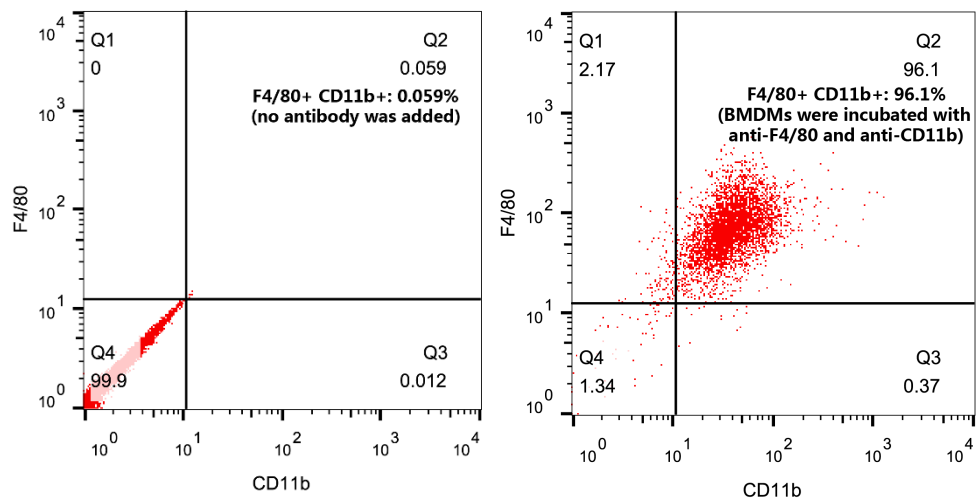

(A)

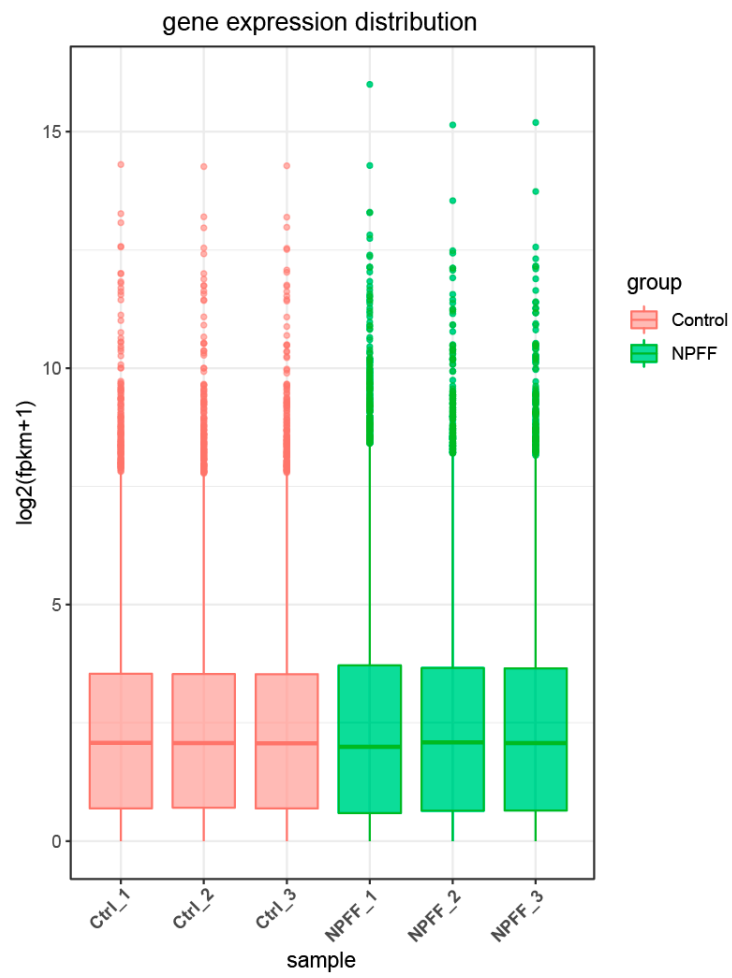

(B)

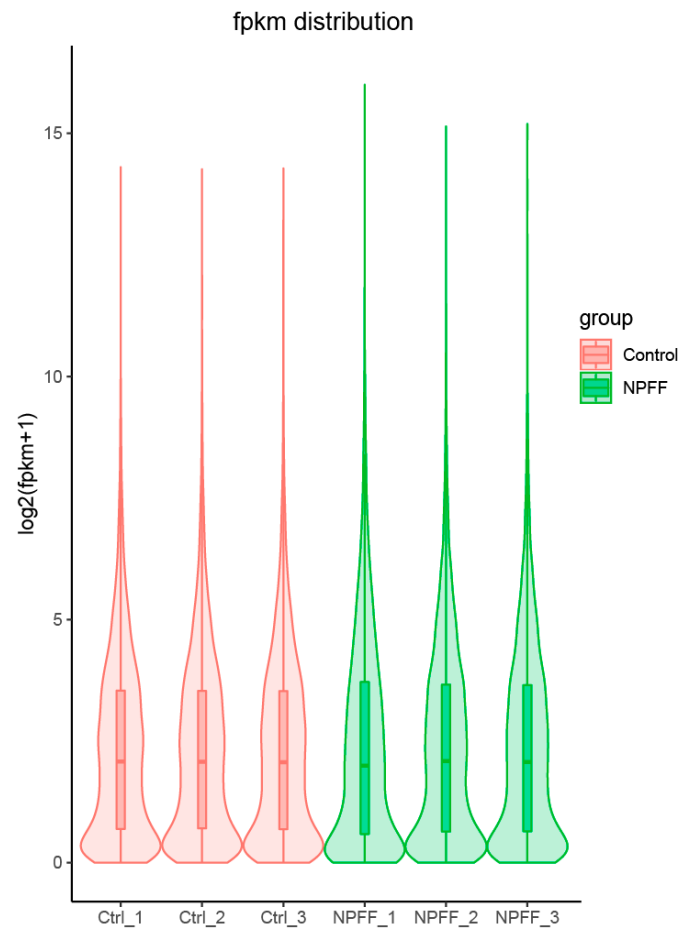

(C)

**Figure S1.** Information of the FACS and RNA-seq detection. (A) BMDMs were analyzed by FACS with anti-F4/80 and anti-CD11b (double-positive ratio: 96.1%). (B) The boxplot of gene expression distribution. (C) Violin plot.
