# Supplementary material for: Transcriptomic Changes in Mouse Bone Marrow-Derived Macrophages Exposed to Neuropeptide FF
Source: MDPI journal article supplement (doi:10.3390/genes12050705), 2021-05-09
Supplement: s1 [file s1]

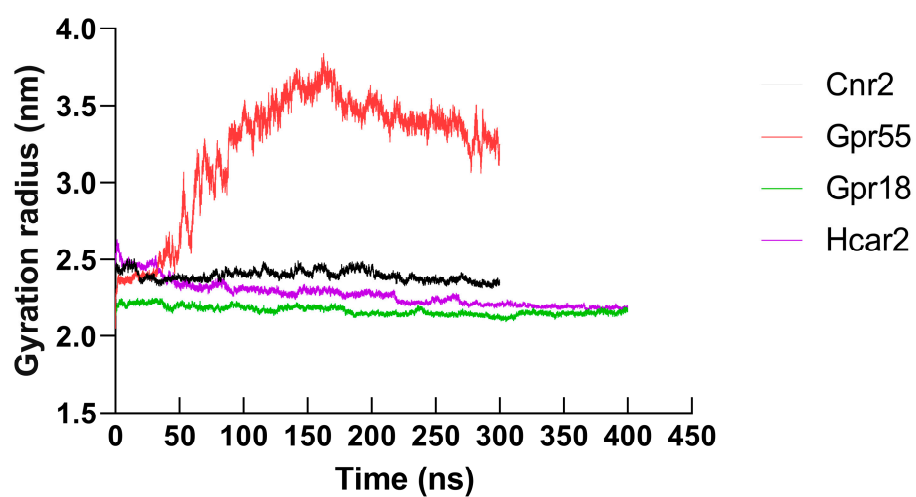

(A)

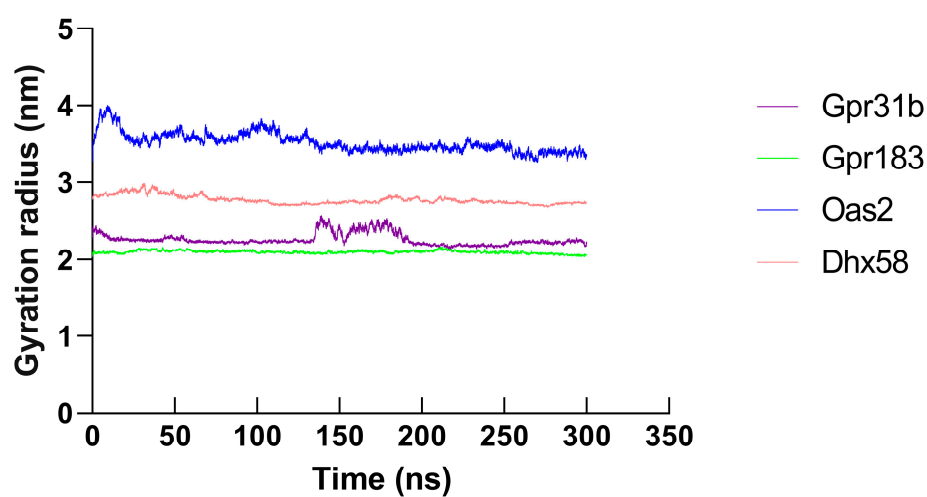

(B)

**Figure S8.** Gyration radius plots of hub proteins in molecular dynamics simulation. The gyration radius of CNR2, GPR55, GPR18, HCAR2, GPR31B, GPR183, OAS2, and DHX58 were shown.
