# Supplementary material for: Transcriptomic Changes in Mouse Bone Marrow-Derived Macrophages Exposed to Neuropeptide FF
Source: MDPI journal article supplement (doi:10.3390/genes12050705), 2021-05-09
Supplement: s1 [file s1]

**Table S8.** Transcriptional factors tied to the up-regulated DEGs

| # | Key TF       | Description                                                                | # of overlapped genes | P value  | FDR      |
|---|--------------|----------------------------------------------------------------------------|-----------------------|----------|----------|
| 1 | <i>Nfkb1</i> | nuclear factor of kappa light polypeptide gene enhancer in B cells 1, p105 | 13                    | 1.06e-16 | 2.55e-15 |
| 2 | <i>Stat1</i> | signal transducer and activator of transcription 1                         | 5                     | 7.79e-09 | 6.97e-08 |
| 3 | <i>Jun</i>   | jun proto-oncogene                                                         | 7                     | 8.71e-09 | 6.97e-08 |
| 4 | <i>Rela</i>  | v-rel reticuloendotheliosis viral oncogene homolog A (avian)               | 6                     | 1.72e-07 | 9.23e-07 |
| 5 | <i>Irf1</i>  | interferon regulatory factor 1                                             | 4                     | 1.92e-07 | 9.23e-07 |
| 6 | <i>Cebpb</i> | CCAAT/enhancer binding protein (C/EBP), beta                               | 4                     | 1.66e-06 | 6.09e-06 |
| 7 | <i>Ikbkb</i> | inhibitor of kappaB kinase beta                                            | 3                     | 1.78e-06 | 6.09e-06 |
| 8 | <i>Fos</i>   | FBJ osteosarcoma oncogene                                                  | 4                     | 5.33e-06 | 1.6e-05  |
| 9 | <i>Irf8</i>  | interferon regulatory factor 8                                             | 3                     | 1.41e-05 | 3.75e-05 |

|    |               |                                                                 |   |          |          |
|----|---------------|-----------------------------------------------------------------|---|----------|----------|
| 10 | <i>Hdac1</i>  | histone deacetylase 1                                           | 3 | 2.59e-05 | 5.64e-05 |
| 11 | <i>Rel</i>    | reticuloendotheliosis oncogene                                  | 3 | 2.59e-05 | 5.64e-05 |
| 12 | <i>Ep300</i>  | E1A binding protein p300                                        | 3 | 0.000258 | 0.000516 |
| 13 | <i>Egr1</i>   | early growth response 1                                         | 3 | 0.000424 | 0.000783 |
| 14 | <i>Pou2f2</i> | POU domain, class 2, transcription factor 2                     | 2 | 0.000555 | 0.000928 |
| 15 | <i>Stat3</i>  | signal transducer and activator of transcription 3              | 3 | 0.00058  | 0.000928 |
| 16 | <i>Klf4</i>   | Kruppel-like factor 4 (gut)                                     | 2 | 0.000696 | 0.00104  |
| 17 | <i>Ahr</i>    | aryl-hydrocarbon receptor                                       | 2 | 0.000936 | 0.00132  |
| 18 | <i>Cebpa</i>  | CCAAT/enhancer binding protein (C/EBP), alpha                   | 2 | 0.00112  | 0.00149  |
| 19 | <i>Spi1</i>   | spleen focus forming virus (SFFV) proviral integration oncogene | 2 | 0.00309  | 0.00389  |
| 20 | <i>Crebbp</i> | CREB binding protein                                            | 2 | 0.00324  | 0.00389  |
| 21 | <i>Ppara</i>  | peroxisome proliferator activated receptor alpha                | 2 | 0.00407  | 0.00465  |

---

|    |              |                                     |   |        |        |
|----|--------------|-------------------------------------|---|--------|--------|
| 22 | <i>Sp3</i>   | trans-acting transcription factor 3 | 2 | 0.0127 | 0.0139 |
| 23 | <i>Trp53</i> | transformation related protein 53   | 2 | 0.0466 | 0.0486 |
| 24 | <i>Sp1</i>   | trans-acting transcription factor 1 | 2 | 0.107  | 0.107  |

Note: data acquired from TRRUST (version 2) (<https://www.grnpedia.org/trrust/>)
