# Supplementary material for: Transcriptomic Changes in Mouse Bone Marrow-Derived Macrophages Exposed to Neuropeptide FF
Source: MDPI journal article supplement (doi:10.3390/genes12050705), 2021-05-09
Supplement: s1 [file s1]

**Table S11.** Ramachandran plot analysis

| <b>Proteins</b> | <b>Number of residues in favoured regions</b> | <b>Number of residues in allowed region</b> | <b>Number of outliers</b> |
|-----------------|-----------------------------------------------|---------------------------------------------|---------------------------|
| Cnr2            | 328/345 (95.1%)                               | 338/345 (98.0%)                             | 7 (0.04%)                 |
| Gpr55           | 287/325 (88.3%)                               | 314/325 (96.6%)                             | 11 (0.03%)                |
| Gpr18           | 296/329 (90.0%)                               | 315/329 (95.7%)                             | 14 (0.04%)                |
| Hcar2           | 333/358 (93.0%)                               | 352/358 (98.3%)                             | 6 (0.02%)                 |
| Gpr31b          | 289/317 (91.2%)                               | 306/317 (96.5%)                             | 11 (0.03%)                |
| Gpr183          | 298/317 (94.0%%)                              | 310/317 (97.8%)                             | 7 (0.02%)                 |
| Oas2            | 725/749 (96.8%)                               | 745/749 (99.5%)                             | 4 (0.01%)                 |
| Dhx58           | 656/676 (97.0%)                               | 670/676 (99.1%)                             | 6 (0.01%)                 |

Note: part of the N-terminal random coil sequence of the hub proteins were removed for subsequent molecular dynamics simulation.
