# Supplementary material for: Transcriptomic Changes in Mouse Bone Marrow-Derived Macrophages Exposed to Neuropeptide FF
Source: MDPI journal article supplement (doi:10.3390/genes12050705), 2021-05-09
Supplement: s1 [file s1]

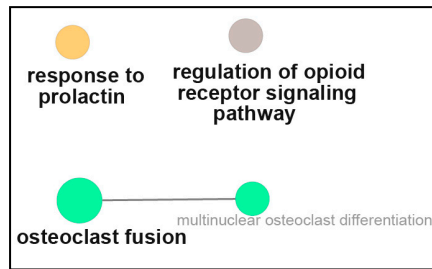

(A)

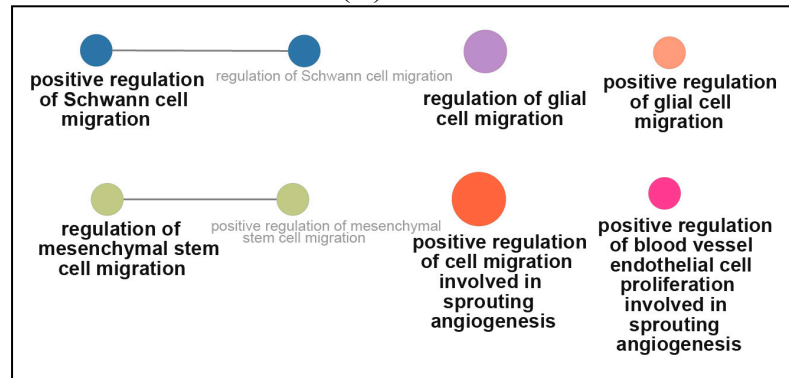

(B)

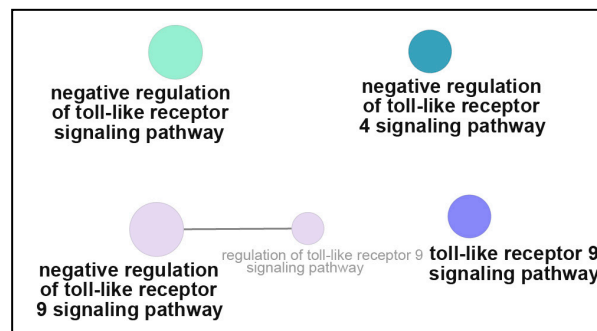

(C)

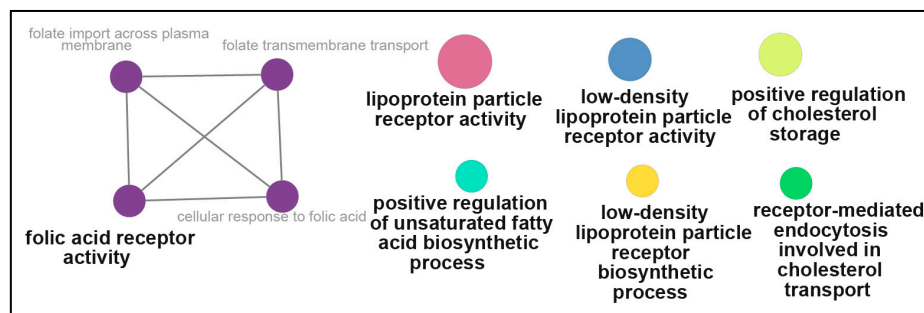

(D)



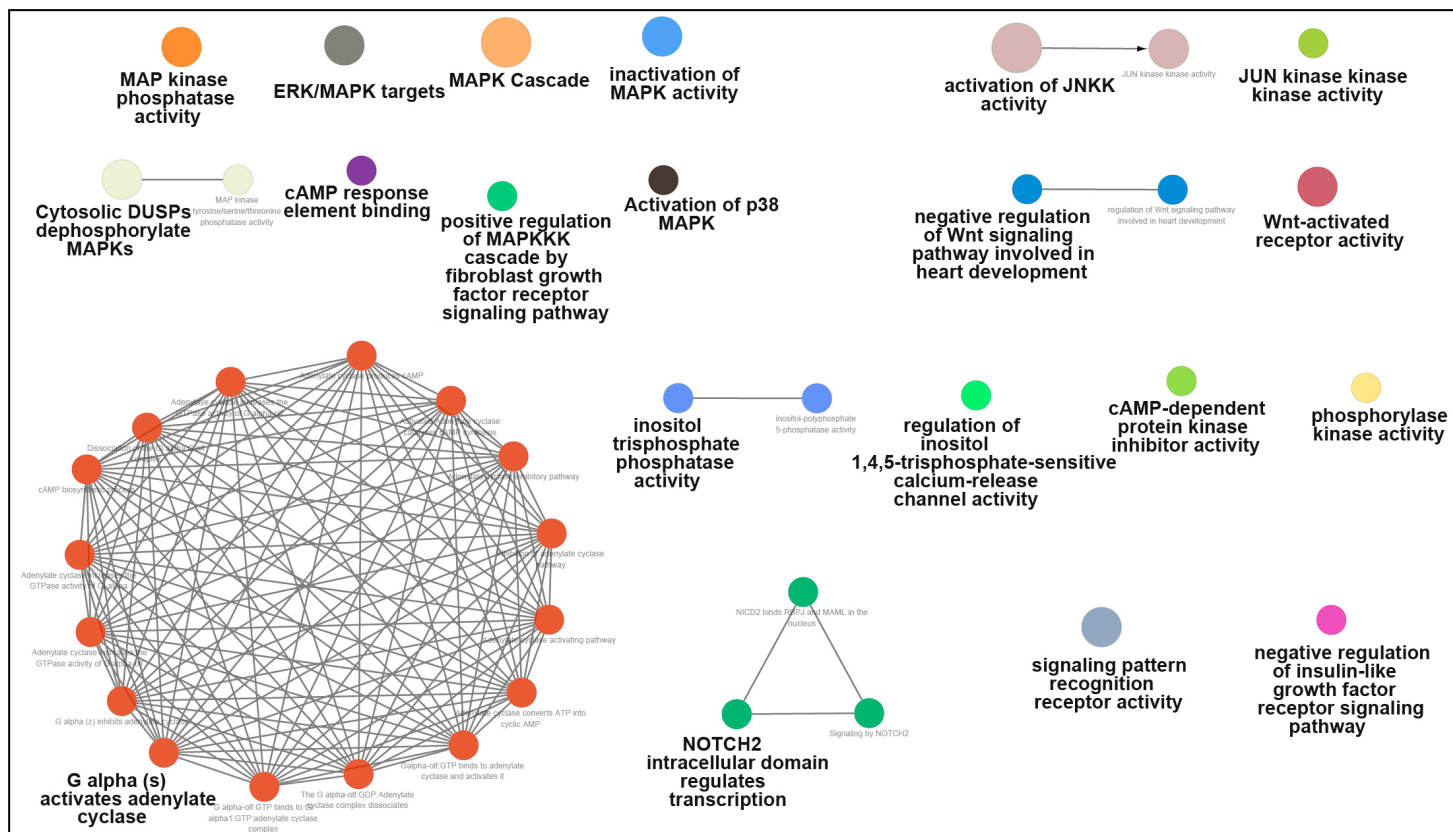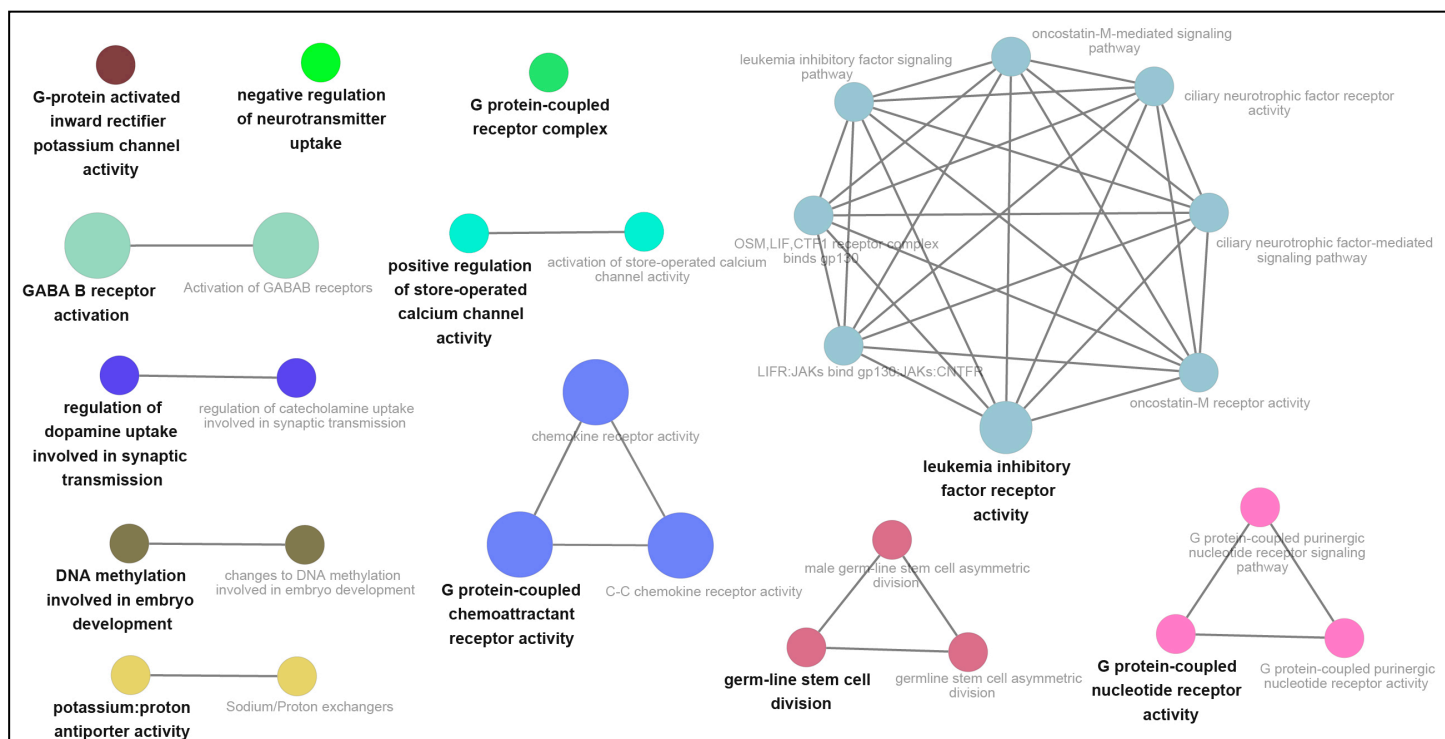

**Figure S2.** Functional enrichment analysis of down-regulated DEGs from ClueGO. (A) prolactin, opioid signaling pathway and osteoclast fusion; (B) toll-like receptor signaling pathway; (C) cell migration; (D) fatty acid metabolism; (E) inflammation and cytokine; (F) cell checkpoints, cell cycle and cell structure; (G) signaling pathways; (H) GPCR and cell channel activity.
