# Supplementary material for: Transcriptomic Changes in Mouse Bone Marrow-Derived Macrophages Exposed to Neuropeptide FF
Source: MDPI journal article supplement (doi:10.3390/genes12050705), 2021-05-09
Supplement: s1 [file s1]

**Table S4.** Details of DEGs-miRNA

| <b>Gene_symbol</b> | <b>log2FoldChange</b> | <b>Padj</b> | <b>Gene_chromosome</b> | <b>Change</b> |
|--------------------|-----------------------|-------------|------------------------|---------------|
| <i>Mir7678</i>     | 4.784597165           | 0.02063689  | 2                      | Up            |
| <i>Mir5107</i>     | 2.847311685           | 0.025899382 | 18                     | Up            |
| <i>Gm27514</i>     | 2.770965467           | 0.049432846 | 6                      | Up            |
| <i>Gm22655</i>     | -5.014771744          | 7.43E-09    | 7                      | Down          |
