# Supplementary material for: Transcriptomic Changes in Mouse Bone Marrow-Derived Macrophages Exposed to Neuropeptide FF
Source: MDPI journal article supplement (doi:10.3390/genes12050705), 2021-05-09
Supplement: s1 [file s1]

**Table S10.** Protein modeling templates

| Proteins | Species      | Protein length (aa) | Model templates (query cover, identify)                                                           |
|----------|--------------|---------------------|---------------------------------------------------------------------------------------------------|
| Cnr2     | Mus musculus | 347                 | 6KPF_R (2.90 Å) (100%, 82.71%)<br>6PT0_R (3.20 Å) (100%, 82.71%)<br>5ZTY_A (2.80 Å) (86%, 84.16%) |
| Gpr55    | Mus musculus | 327                 | 5XSZ_A (3.20 Å) (59%, 35.44%)<br>4YAY_A (2.90 Å) (88%, 27.12%)<br>4ZUD_A (2.80 Å) (88%, 27.12%)   |
| Gpr18    | Mus musculus | 331                 | 5XSZ_A (3.20 Å) (63%, 31.39%)<br>6WWZ_R (3.34 Å) (88%, 27.39%)<br>6RZ6_A (2.43 Å) (66%, 27.13%)   |
| Hcar2    | Mus musculus | 360                 | 4XNV_A (2.20 Å) (84%, 24.59%)<br>6WWZ_R (3.34 Å) (86%, 27.36%)<br>6RZ6_A (2.43 Å) (45%, 36.36%)   |
| Gpr31b   | Mus musculus | 319                 | 6WWZ_R (3.34 Å) (93%, 26.95%)<br>6RZ6_A (2.43 Å) (56%, 30.77%)<br>4XNV_A (2.20 Å) (90%, 23.34%)   |
| Gpr183   | Mus musculus | 357                 | 5LWE_A (2.80 Å) (90%, 28.40%)<br>4YAY_A (2.90 Å) (86%, 27.80%)<br>4ZUD_A (2.80 Å) (85%, 27.42%)   |
| Oas2     | Mus musculus | 751                 | <i>De novo</i> by Rosetta                                                                         |
| Dhx58    | Mus musculus | 678                 | 5JB2_A (2.20 Å) (99%, 51.47%)<br>5JAJ_A (1.50 Å) (99%, 51.47%)<br>5JC3_A (2.60 Å) (97%, 42.67%)   |
