# Supplementary material for: Transcriptomic Changes in Mouse Bone Marrow-Derived Macrophages Exposed to Neuropeptide FF
Source: MDPI journal article supplement (doi:10.3390/genes12050705), 2021-05-09
Supplement: s1 [file s1]

**Table S9.** Transcriptional factors tied to the down-regulated DEGs

| #  | Key TF       | Description                                      | # of overlapped genes | P value  | FDR     |
|----|--------------|--------------------------------------------------|-----------------------|----------|---------|
| 1  | <i>Sp3</i>   | trans-acting transcription factor 3              | 7                     | 0.000239 | 0.00812 |
| 2  | <i>Esr1</i>  | estrogen receptor 1 (alpha)                      | 4                     | 0.000854 | 0.012   |
| 3  | <i>Atf2</i>  | activating transcription factor 2                | 3                     | 0.00159  | 0.012   |
| 4  | <i>Gtf2i</i> | general transcription factor II I                | 3                     | 0.00159  | 0.012   |
| 5  | <i>Esr2</i>  | estrogen receptor 2 (beta)                       | 3                     | 0.00191  | 0.012   |
| 6  | <i>Sp1</i>   | trans-acting transcription factor 1              | 11                    | 0.0025   | 0.012   |
| 7  | <i>Nr0b2</i> | nuclear receptor subfamily 0, group B, member 2  | 3                     | 0.00266  | 0.012   |
| 8  | <i>Smad4</i> | SMAD family member 4                             | 4                     | 0.00289  | 0.012   |
| 9  | <i>Ehmt2</i> | euchromatic histone lysine N-methyltransferase 2 | 2                     | 0.00319  | 0.012   |
| 10 | <i>Egr1</i>  | early growth response 1                          | 5                     | 0.00414  | 0.0141  |

|    |              |                                                    |   |         |        |
|----|--------------|----------------------------------------------------|---|---------|--------|
| 11 | <i>Sp4</i>   | trans-acting transcription factor 4                | 2 | 0.00584 | 0.018  |
| 12 | <i>Ncoa3</i> | nuclear receptor coactivator 3                     | 2 | 0.00743 | 0.021  |
| 13 | <i>Gfi1</i>  | growth factor independent 1                        | 2 | 0.0092  | 0.024  |
| 14 | <i>Ppard</i> | peroxisome proliferator activator receptor delta   | 2 | 0.0111  | 0.027  |
| 15 | <i>Ep300</i> | E1A binding protein p300                           | 4 | 0.0122  | 0.0277 |
| 16 | <i>Xbp1</i>  | X-box binding protein 1                            | 2 | 0.0155  | 0.0329 |
| 17 | <i>Cebpb</i> | CCAAT/enhancer binding protein (C/EBP), beta       | 3 | 0.0245  | 0.049  |
| 18 | <i>Stat3</i> | signal transducer and activator of transcription 3 | 4 | 0.0303  | 0.0573 |
| 19 | <i>Foxo1</i> | forkhead box O1                                    | 3 | 0.0364  | 0.0619 |
| 20 | <i>Smad3</i> | SMAD family member 3                               | 3 | 0.0364  | 0.0619 |
| 21 | <i>Pparg</i> | peroxisome proliferator activated receptor gamma   | 3 | 0.0384  | 0.0621 |
| 22 | <i>Pitx2</i> | paired-like homeodomain transcription factor 2     | 2 | 0.0492  | 0.0761 |

|    |               |                                                                               |   |        |       |
|----|---------------|-------------------------------------------------------------------------------|---|--------|-------|
| 23 | <i>Creb1</i>  | cAMP responsive element binding protein 1                                     | 2 | 0.0775 | 0.115 |
| 24 | <i>Rela</i>   | v-rel reticuloendotheliosis viral oncogene homolog A (avian)                  | 4 | 0.107  | 0.152 |
| 25 | <i>Spi1</i>   | spleen focus forming virus (SFFV) proviral integration<br>oncogene            | 2 | 0.119  | 0.162 |
| 26 | <i>Crebbp</i> | CREB binding protein                                                          | 2 | 0.124  | 0.163 |
| 27 | <i>Ppara</i>  | peroxisome proliferator activated receptor alpha                              | 2 | 0.15   | 0.189 |
| 28 | <i>E2f1</i>   | E2F transcription factor 1                                                    | 2 | 0.165  | 0.194 |
| 29 | <i>Myc</i>    | myelocytomatosis oncogene                                                     | 2 | 0.165  | 0.194 |
| 30 | <i>Nfkb1</i>  | nuclear factor of kappa light polypeptide gene enhancer in B<br>cells 1, p105 | 5 | 0.179  | 0.203 |
| 31 | <i>Nfe2l2</i> | nuclear factor, erythroid derived 2, like 2                                   | 2 | 0.187  | 0.205 |
| 32 | <i>Ets1</i>   | E26 avian leukemia oncogene 1, 5' domain                                      | 2 | 0.219  | 0.233 |
| 33 | <i>Ctnnb1</i> | catenin (cadherin associated protein), beta 1                                 | 2 | 0.236  | 0.243 |

---

---

|    |              |                                   |   |       |       |
|----|--------------|-----------------------------------|---|-------|-------|
| 34 | <i>Trp53</i> | transformation related protein 53 | 2 | 0.714 | 0.714 |
|----|--------------|-----------------------------------|---|-------|-------|

---

Note: data obtained from TRRUST (version 2) (<https://www.grnpedia.org/trrust/>)
