# Supplementary material for: Transcriptomic Changes in Mouse Bone Marrow-Derived Macrophages Exposed to Neuropeptide FF
Source: MDPI journal article supplement (doi:10.3390/genes12050705), 2021-05-09
Supplement: s1 [file s1]

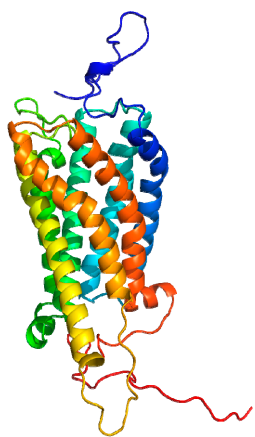

**CNR2**

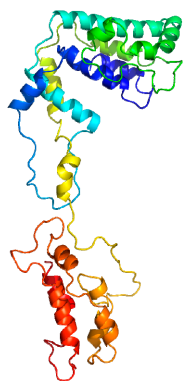

**GPR55**

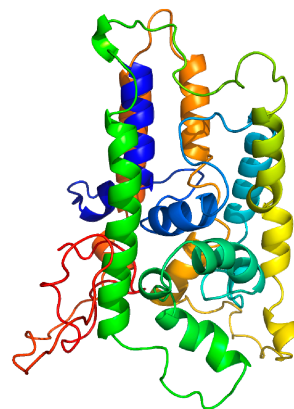

**GPR18**

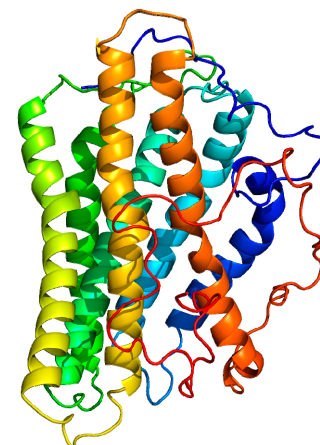

**HCAR2**

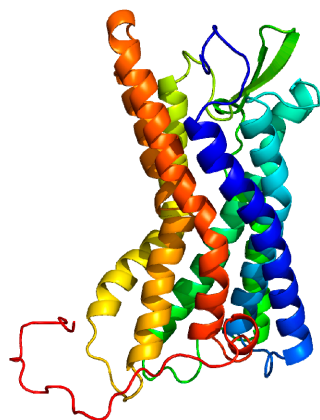

**GPR31B**

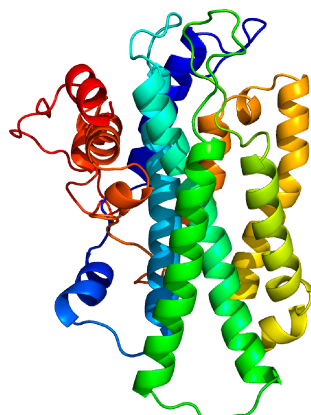

**GPR183**

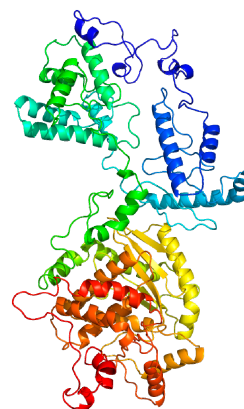

**OAS2**

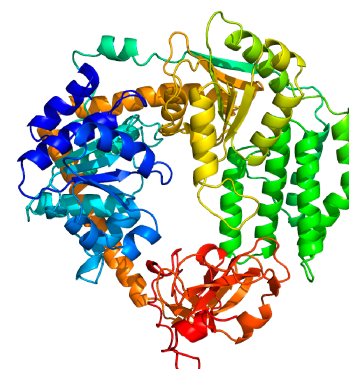

**DHX58**

**Figure S9.** The 3-D structure of hub proteins. Three dimensional structures of MD-optimized hub proteins were presented, including CNR2, GPR55, GPR18, HCAR2, GPR31B, GPR183, OAS2, and DHX58. The picture was generated using the Pymol software (Delano, W.L. The Pymol Molecular Graphics System (2002) DeLano Scientific, SanCarlos, CA, USA. <http://www.pymol.org>).
