# Supplementary material for: Transcriptomic Changes in Mouse Bone Marrow-Derived Macrophages Exposed to Neuropeptide FF
Source: MDPI journal article supplement (doi:10.3390/genes12050705), 2021-05-09
Supplement: s1 [file s1]

**Table S3.** Details of DEGs-antisense RNA

| <b>Gene_symbol</b>   | <b>log2FoldChange</b> | <b>Padj</b> | <b>Gene_chromosome</b> | <b>Change</b> |
|----------------------|-----------------------|-------------|------------------------|---------------|
| <i>Gm20560</i>       | -4.477696393          | 0.02838732  | 6                      | Down          |
| <i>Gm48001</i>       | -4.031365657          | 0.034158753 | 12                     | Down          |
| <i>Gm13184</i>       | -3.878019472          | 0.048549888 | 2                      | Down          |
| <i>Gm16183</i>       | -3.732008185          | 0.014807924 | 8                      | Down          |
| <i>Gm42848</i>       | -3.396692793          | 0.000395032 | 5                      | Down          |
| <i>Gm47815</i>       | -3.070557542          | 9.80E-06    | 10                     | Down          |
| <i>5033421B08Rik</i> | -3.046488446          | 8.32E-05    | 12                     | Down          |
| <i>Gm48837</i>       | -2.872108966          | 0.017640377 | 13                     | Down          |
| <i>Gm28800</i>       | -2.689669926          | 0.000173113 | 1                      | Down          |
| <i>Gm9888</i>        | -2.480965706          | 0.00052299  | 9                      | Down          |
| <i>Dnmt3aos</i>      | -2.47570737           | 2.80E-18    | 12                     | Down          |
| <i>Gm44710</i>       | -2.206127545          | 0.008721769 | 7                      | Down          |
| <i>4930539J05Rik</i> | -2.137814059          | 0.015358942 | 3                      | Down          |
| <i>Gm21057</i>       | -2.055240025          | 0.023860499 | 7                      | Down          |
| <i>Gm10602</i>       | -1.998756748          | 0.001107735 | 7                      | Down          |
| <i>Tnfsf13os</i>     | -1.936374481          | 0.000163157 | 11                     | Down          |
| <i>1700008B11Rik</i> | -1.866257764          | 0.044415835 | 5                      | Down          |
| <i>Far1os</i>        | -1.834662754          | 0.048197804 | 7                      | Down          |
| <i>Gm45449</i>       | -1.759760296          | 0.010465368 | 8                      | Down          |
| <i>F630028O10Rik</i> | -1.73560559           | 1.01E-42    | X                      | Down          |
| <i>Gm13963</i>       | -1.692248954          | 0.049854509 | 2                      | Down          |
| <i>Gm45820</i>       | -1.670446256          | 0.01101733  | 8                      | Down          |
| <i>Gm44206</i>       | -1.645266865          | 0.028506013 | 6                      | Down          |
| <i>Gm26947</i>       | -1.570075177          | 9.07E-16    | 10                     | Down          |
| <i>4930473A02Rik</i> | -1.54872006           | 0.003456538 | 2                      | Down          |
| <i>Gm26740</i>       | -1.469030632          | 3.99E-05    | 10                     | Down          |
| <i>C920021L13Rik</i> | -1.459186267          | 0.020840888 | 3                      | Down          |
| <i>Gm13091</i>       | -1.43528153           | 0.001984295 | 4                      | Down          |
| <i>Gm30329</i>       | -1.422826899          | 2.75E-09    | 8                      | Down          |
| <i>4930481A15Rik</i> | -1.411291849          | 8.98E-05    | 19                     | Down          |
| <i>C230037L18Rik</i> | -1.302542029          | 0.010522554 | 15                     | Down          |
| <i>6330562C20Rik</i> | -1.302312567          | 0.005422527 | 3                      | Down          |
| <i>Tmem147os</i>     | -1.224910449          | 0.006126168 | 7                      | Down          |
| <i>Gm15545</i>       | -1.088971597          | 0.026191345 | 7                      | Down          |
| <i>Gm16685</i>       | 7.323607967           | 1.13E-07    | 3                      | Up            |
| <i>Gm15987</i>       | 7.072521673           | 3.77E-07    | 6                      | Up            |
| <i>Gm13822</i>       | 6.91522192            | 2.61E-06    | 5                      | Up            |
| <i>Gm13571</i>       | 6.746027348           | 5.21E-06    | 2                      | Up            |
| <i>Gm20655</i>       | 5.681033575           | 0.00059409  | 10                     | Up            |
| <i>Gm16015</i>       | 5.646085952           | 0.003802181 | 5                      | Up            |
| <i>Gm26693</i>       | 5.252898344           | 0.009546542 | 17                     | Up            |
| <i>A630012P03Rik</i> | 5.14203699            | 0.004040299 | X                      | Up            |
| <i>A730090N16Rik</i> | 4.488866005           | 0.037443696 | 3                      | Up            |
| <i>Gm12764</i>       | 4.226445974           | 0.02719468  | 7                      | Up            |
| <i>Gm10552</i>       | 4.160886344           | 0.0336598   | 1                      | Up            |
| <i>Taco1os</i>       | 4.086733481           | 0.023402431 | 11                     | Up            |

|                      |             |             |    |    |
|----------------------|-------------|-------------|----|----|
| <i>Gm43221</i>       | 4.077213772 | 0.027065588 | 3  | Up |
| <i>Gm44418</i>       | 3.796206852 | 4.85E-05    | 6  | Up |
| <i>4930512H18Rik</i> | 3.603696858 | 1.12E-05    | 8  | Up |
| <i>AC113595.1</i>    | 2.723430583 | 2.84E-10    | 15 | Up |
| <i>Gm15523</i>       | 2.609735929 | 0.027556865 | 12 | Up |
| <i>Gm20234</i>       | 2.379881272 | 0.000739913 | 11 | Up |
| <i>Gm15512</i>       | 2.370590804 | 0.003706703 | 14 | Up |
| <i>Gm4117</i>        | 2.284853636 | 0.006518447 | 13 | Up |
| <i>Gm15133</i>       | 2.265397889 | 0.0034075   | 7  | Up |
| <i>Gm20658</i>       | 2.173694888 | 9.38E-25    | 12 | Up |
| <i>1700058P15Rik</i> | 2.086355402 | 7.84E-09    | 7  | Up |
| <i>Gm11131</i>       | 2.060568074 | 1.56E-06    | 17 | Up |
| <i>Gm11772</i>       | 1.891805161 | 0.000105395 | 11 | Up |
| <i>A530040E14Rik</i> | 1.846959476 | 1.15E-07    | 1  | Up |
| <i>Gm15601</i>       | 1.824517555 | 6.02E-09    | 14 | Up |
| <i>Gm10425</i>       | 1.804278209 | 4.04E-07    | 12 | Up |
| <i>Gm16174</i>       | 1.796568511 | 0.043264517 | 7  | Up |
| <i>9530082P21Rik</i> | 1.748347512 | 0.00018501  | 17 | Up |
| <i>1700071M16Rik</i> | 1.472811487 | 0.035532138 | 17 | Up |
| <i>Gm17017</i>       | 1.371005961 | 0.036156061 | 1  | Up |
| <i>Gm13205</i>       | 1.234863846 | 0.039889331 | 4  | Up |
| <i>Gm17435</i>       | 1.117559582 | 0.022453251 | 8  | Up |
| <i>Gm37787</i>       | 1.106567929 | 0.016016273 | 1  | Up |
| <i>AC168220.3</i>    | 1.064416591 | 0.021879086 | 16 | Up |
