# Supplementary material for: Transcriptomic Changes in Mouse Bone Marrow-Derived Macrophages Exposed to Neuropeptide FF
Source: MDPI journal article supplement (doi:10.3390/genes12050705), 2021-05-09
Supplement: s1 [file s1]

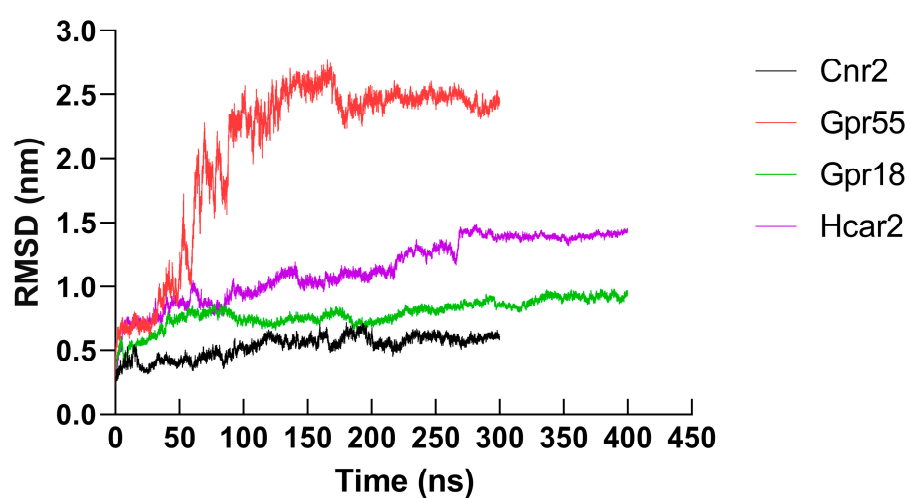

(A)

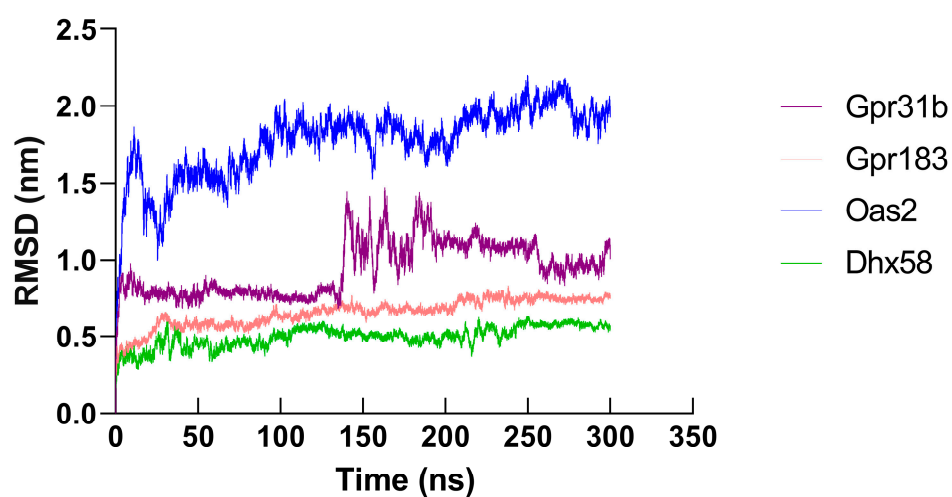

(B)

**Figure S6.** RMSD plots of backbone C $\alpha$  atoms in molecular dynamics simulation. To show the deviations of DEGs protein clearly, RMSD plots were presented (CNR2, GPR55, GPR18, HCAR2, GPR31B, GPR183, OAS2, and DHX58).
