# Supplementary material for: Transcriptomic Changes in Mouse Bone Marrow-Derived Macrophages Exposed to Neuropeptide FF
Source: MDPI journal article supplement (doi:10.3390/genes12050705), 2021-05-09
Supplement: s1 [file s1]

**Table S5.** Details of DEGs-lincRNA

| <b>Gene_symbol</b>   | <b>log2FoldChange</b> | <b>Padj</b> | <b>Gene_chromosome</b> | <b>Change</b> |
|----------------------|-----------------------|-------------|------------------------|---------------|
| <i>Gm16701</i>       | -5.126604061          | 0.003623101 | 1                      | Down          |
| <i>F730035P03Rik</i> | -4.250150125          | 0.04175541  | 7                      | Down          |
| <i>Gm45847</i>       | -3.666042933          | 0.003083492 | 7                      | Down          |
| <i>Gm32098</i>       | -3.652095939          | 0.000990913 | 8                      | Down          |
| <i>Prr33</i>         | -3.562961825          | 0.000104425 | 7                      | Down          |
| <i>C230035I16Rik</i> | -3.520884207          | 0.004410299 | 13                     | Down          |
| <i>Gm14321</i>       | -3.382586061          | 0.000209103 | 2                      | Down          |
| <i>9230111E07Rik</i> | -3.285892655          | 0.011217421 | 2                      | Down          |
| <i>C030034L19Rik</i> | -3.164875214          | 4.71E-13    | 3                      | Down          |
| <i>Gm29291</i>       | -3.029453064          | 0.005975423 | 1                      | Down          |
| <i>Gm26669</i>       | -2.964902562          | 0.004284723 | 12                     | Down          |
| <i>Gm37168</i>       | -2.653557551          | 2.56E-08    | 1                      | Down          |
| <i>Gm5086</i>        | -2.634093104          | 1.08E-18    | 13                     | Down          |
| <i>Gm33103</i>       | -2.490533994          | 0.000849217 | 8                      | Down          |
| <i>Gm26890</i>       | -2.480858758          | 0.015855368 | 7                      | Down          |
| <i>Gm14221</i>       | -2.434502701          | 2.42E-06    | 2                      | Down          |
| <i>D630033O11Rik</i> | -2.353592699          | 0.000297175 | 9                      | Down          |
| <i>AC125351.1</i>    | -2.312379431          | 3.31E-08    | 12                     | Down          |
| <i>Gm6634</i>        | -2.107551092          | 0.002323299 | 3                      | Down          |
| <i>2810455O05Rik</i> | -2.069891009          | 0.007164369 | 8                      | Down          |
| <i>Gm26581</i>       | -2.063437421          | 0.029599787 | 10                     | Down          |
| <i>F730311O21Rik</i> | -2.051282806          | 8.15E-12    | 1                      | Down          |
| <i>Gm13391</i>       | -2.028096446          | 5.74E-16    | 2                      | Down          |
| <i>CT030636.2</i>    | -2.008808634          | 0.025784211 | 17                     | Down          |
| <i>Gm14168</i>       | -1.788496039          | 0.029089616 | 2                      | Down          |
| <i>5033430I15Rik</i> | -1.725782766          | 0.027019502 | 13                     | Down          |
| <i>Gm16907</i>       | -1.721117406          | 0.002643347 | 13                     | Down          |
| <i>Gm44053</i>       | -1.70633157           | 0.00155334  | 6                      | Down          |
| <i>Gm43672</i>       | -1.633535781          | 8.01E-05    | 3                      | Down          |
| <i>Gm38399</i>       | -1.599187123          | 0.020340894 | 1                      | Down          |
| <i>5031425F14Rik</i> | -1.543963507          | 0.001285135 | 2                      | Down          |
| <i>2610035D17Rik</i> | -1.500671555          | 3.30E-06    | 11                     | Down          |
| <i>Gm26912</i>       | -1.462380696          | 0.031340758 | 12                     | Down          |
| <i>Gm12708</i>       | -1.430923154          | 0.012597571 | 4                      | Down          |
| <i>Gm14461</i>       | -1.421249816          | 7.42E-12    | 2                      | Down          |
| <i>A230028O05Rik</i> | -1.415214623          | 0.000911635 | 16                     | Down          |
| <i>Gm28875</i>       | -1.378293266          | 0.004856812 | 12                     | Down          |
| <i>4930480K23Rik</i> | -1.354841253          | 0.025864473 | 14                     | Down          |
| <i>Gm45752</i>       | -1.351829107          | 0.000584949 | 8                      | Down          |
| <i>Gm15706</i>       | -1.304220026          | 0.028651432 | 6                      | Down          |
| <i>Zfp469</i>        | -1.265636393          | 0.000402742 | 8                      | Down          |
| <i>Mirt1</i>         | -1.208652324          | 0.000545404 | 19                     | Down          |
| <i>Al839979</i>      | -1.190280118          | 3.62E-06    | 5                      | Down          |
| <i>4933404O12Rik</i> | -1.133674402          | 0.003168001 | 5                      | Down          |
| <i>Gm20342</i>       | -1.078435468          | 0.046859885 | 1                      | Down          |
| <i>AU022793</i>      | -1.04132826           | 1.71E-05    | 15                     | Down          |

|                      |              |             |    |      |
|----------------------|--------------|-------------|----|------|
| <i>Malat1</i>        | -1.000935105 | 0.027019502 | 19 | Down |
| <i>Mir155hg</i>      | 8.003872703  | 6.53E-13    | 16 | Up   |
| <i>AW112010</i>      | 6.431920186  | 2.55E-76    | 19 | Up   |
| <i>Gm34643</i>       | 5.559101476  | 7.85E-64    | 14 | Up   |
| <i>Gm47903</i>       | 5.479951     | 0.00201844  | 10 | Up   |
| <i>1700003M07Rik</i> | 5.472100782  | 0.003018506 | 4  | Up   |
| <i>Gm1720</i>        | 5.257889984  | 1.91E-07    | X  | Up   |
| <i>Gm32089</i>       | 5.040831793  | 1.44E-06    | 13 | Up   |
| <i>Gm47242</i>       | 5.018134255  | 6.99E-06    | 19 | Up   |
| <i>Gm13814</i>       | 4.947074144  | 0.014512935 | 2  | Up   |
| <i>Gm36723</i>       | 4.853195458  | 0.017384271 | 12 | Up   |
| <i>4930440119Rik</i> | 4.749320785  | 0.004559454 | 2  | Up   |
| <i>Gm47896</i>       | 4.649036342  | 0.021331969 | 10 | Up   |
| <i>Gm30918</i>       | 4.543592315  | 0.035894281 | 13 | Up   |
| <i>A930003A15Rik</i> | 4.448165521  | 0.001611213 | 16 | Up   |
| <i>Gm28935</i>       | 4.40785057   | 0.012410559 | 19 | Up   |
| <i>Gm11707</i>       | 4.173852513  | 0.000761993 | 11 | Up   |
| <i>Ptgs2os2</i>      | 4.099847131  | 0.000153995 | 1  | Up   |
| <i>A330074K22Rik</i> | 3.851686632  | 1.84E-13    | 8  | Up   |
| <i>4933432103Rik</i> | 3.783570836  | 7.89E-05    | 14 | Up   |
| <i>1110002J07Rik</i> | 3.396416925  | 1.75E-61    | 10 | Up   |
| <i>Gm15675</i>       | 3.330630066  | 3.87E-06    | 1  | Up   |
| <i>Gm7644</i>        | 2.991405781  | 0.028122236 | 14 | Up   |
| <i>Gm14005</i>       | 2.740490974  | 2.75E-12    | 2  | Up   |
| <i>Gm37336</i>       | 2.642118335  | 0.02520462  | 1  | Up   |
| <i>Gm36161</i>       | 2.270064125  | 1.26E-26    | 13 | Up   |
| <i>Bvht</i>          | 2.182040101  | 2.13E-06    | 18 | Up   |
| <i>Gm41409</i>       | 2.066416691  | 0.011298259 | 16 | Up   |
| <i>Gm26981</i>       | 2.054532574  | 0.010961957 | 7  | Up   |
| <i>Gm33929</i>       | 2.052764637  | 0.019775556 | 12 | Up   |
| <i>Gm26797</i>       | 1.734768763  | 3.40E-05    | 9  | Up   |
| <i>Gm17705</i>       | 1.708861448  | 0.000240355 | 17 | Up   |
| <i>D330050G23Rik</i> | 1.665411171  | 0.04650436  | 2  | Up   |
| <i>Gm48653</i>       | 1.62818063   | 2.53E-09    | 12 | Up   |
| <i>4833445107Rik</i> | 1.494226188  | 5.73E-06    | 9  | Up   |
| <i>Gm44751</i>       | 1.473263173  | 0.013512926 | 7  | Up   |
| <i>Gm46224</i>       | 1.392726741  | 1.33E-05    | 10 | Up   |
| <i>Gm11110</i>       | 1.375876387  | 0.001689757 | 17 | Up   |
| <i>Trp53cor1</i>     | 1.348895792  | 0.042675013 | 17 | Up   |
| <i>Al427809</i>      | 1.316168185  | 0.013503108 | 4  | Up   |
| <i>9330175E14Rik</i> | 1.175473937  | 0.000106819 | 8  | Up   |
| <i>Snhg6</i>         | 1.148544826  | 0.005884782 | 1  | Up   |
| <i>Gm26637</i>       | 1.103747863  | 0.00034153  | 17 | Up   |
| <i>Gm7160</i>        | 1.071486617  | 0.000406581 | 1  | Up   |
| <i>Al504432</i>      | 1.015445503  | 6.12E-05    | 3  | Up   |
