# Supplementary material for: Transcriptomic Changes in Mouse Bone Marrow-Derived Macrophages Exposed to Neuropeptide FF
Source: MDPI journal article supplement (doi:10.3390/genes12050705), 2021-05-09
Supplement: s1 [file s1]

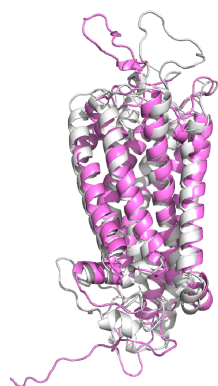

**CNR2**

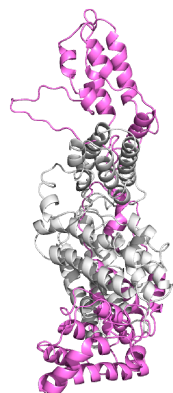

**GPR55**

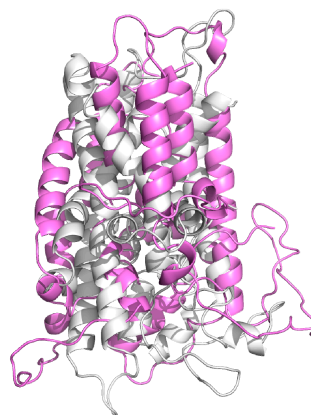

**GPR18**

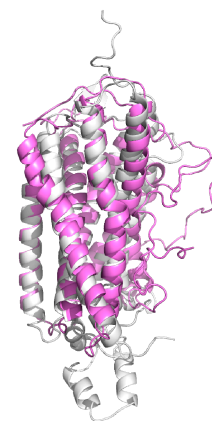

**HCAR2**

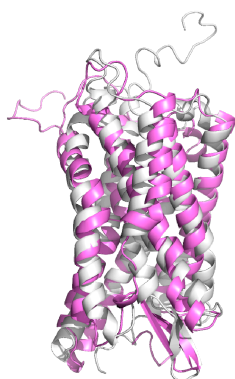

**GPR31B**

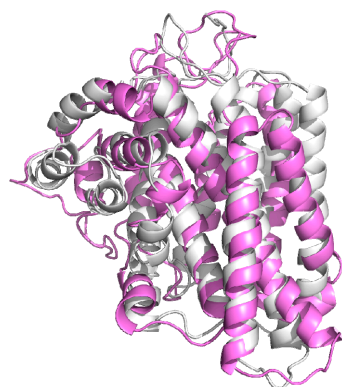

**GPR183**

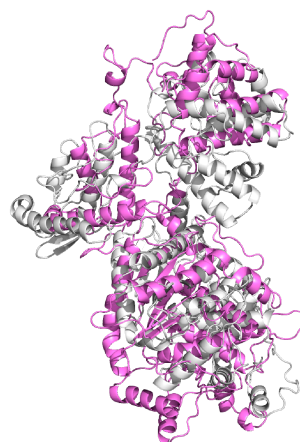

**OAS2**

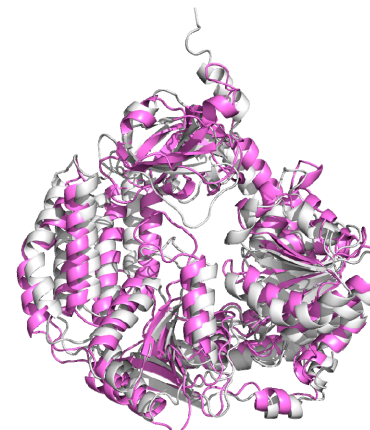

**DHX58**

**Figure S5.** Superposition of the MD-optimized protein structure (violet) and the primarily modeled structure (gray). The picture was produced with the Pymol software (Delano, W.L. The Pymol Molecular Graphics System (2002) DeLano Scientific, SanCarlos, CA, USA. <http://www.pymol.org>).
