# Supplementary material for: Transcriptomic Changes in Mouse Bone Marrow-Derived Macrophages Exposed to Neuropeptide FF
Source: MDPI journal article supplement (doi:10.3390/genes12050705), 2021-05-09
Supplement: s1 [file s1]

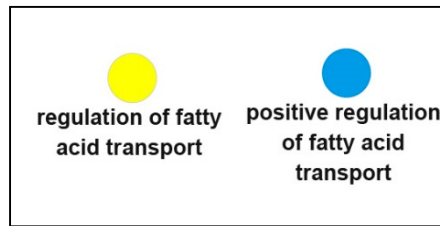

(A)

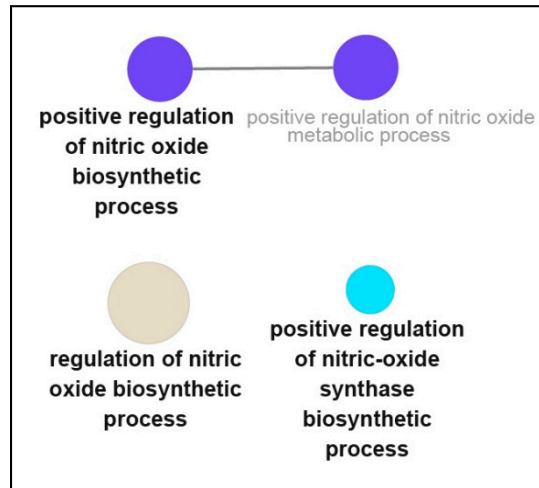

(B)

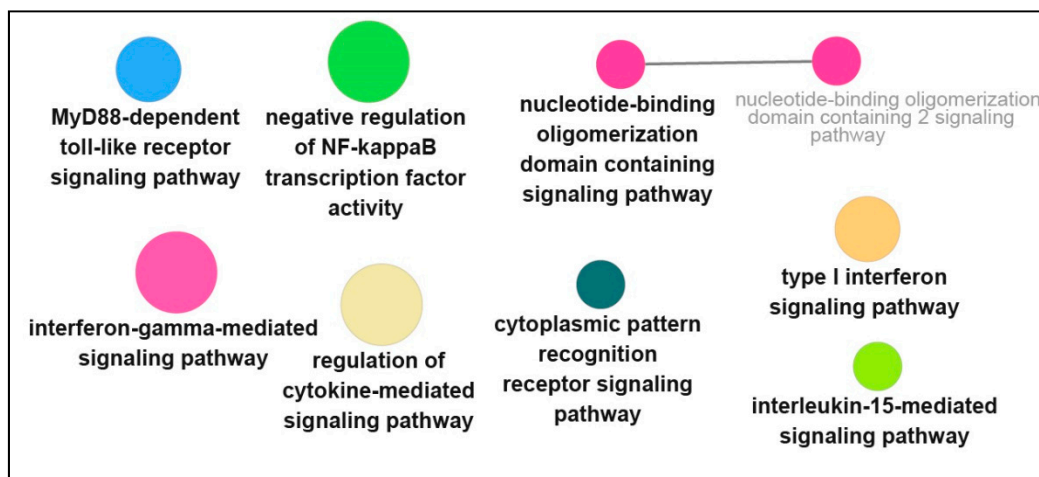

(C)

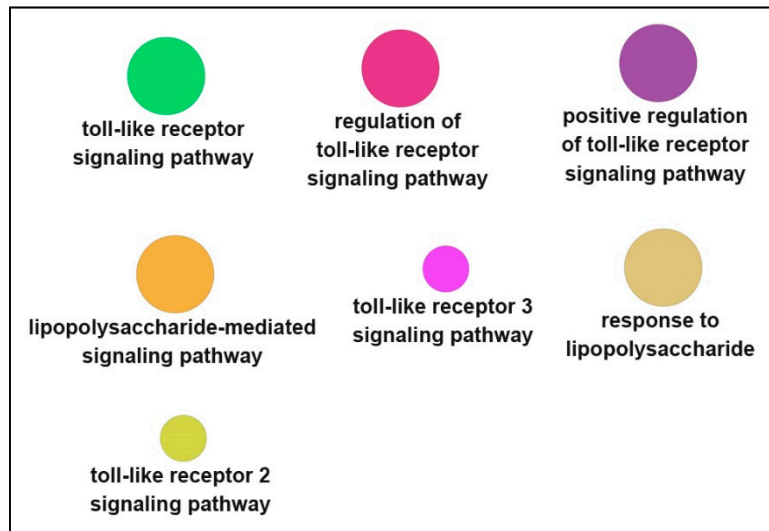

(D)

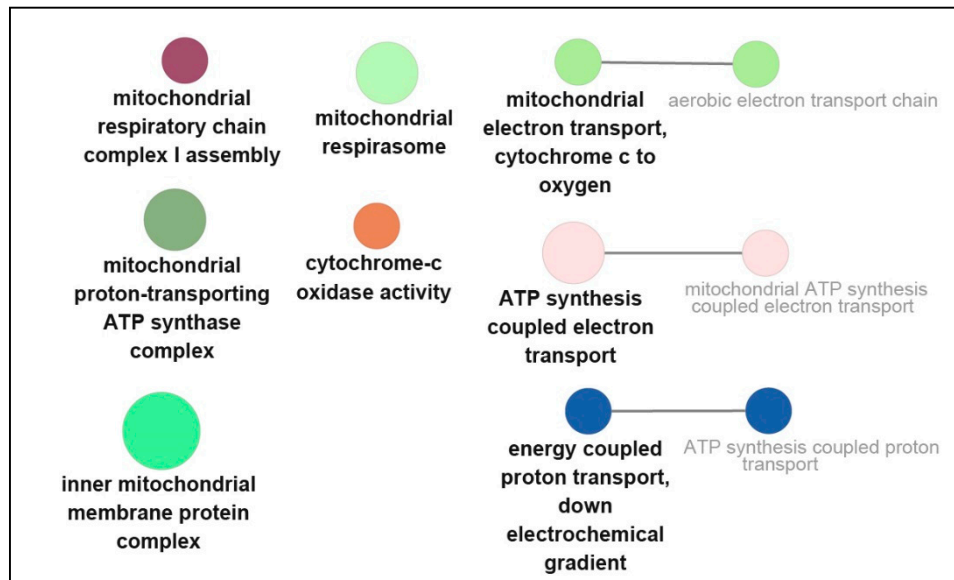

(E)

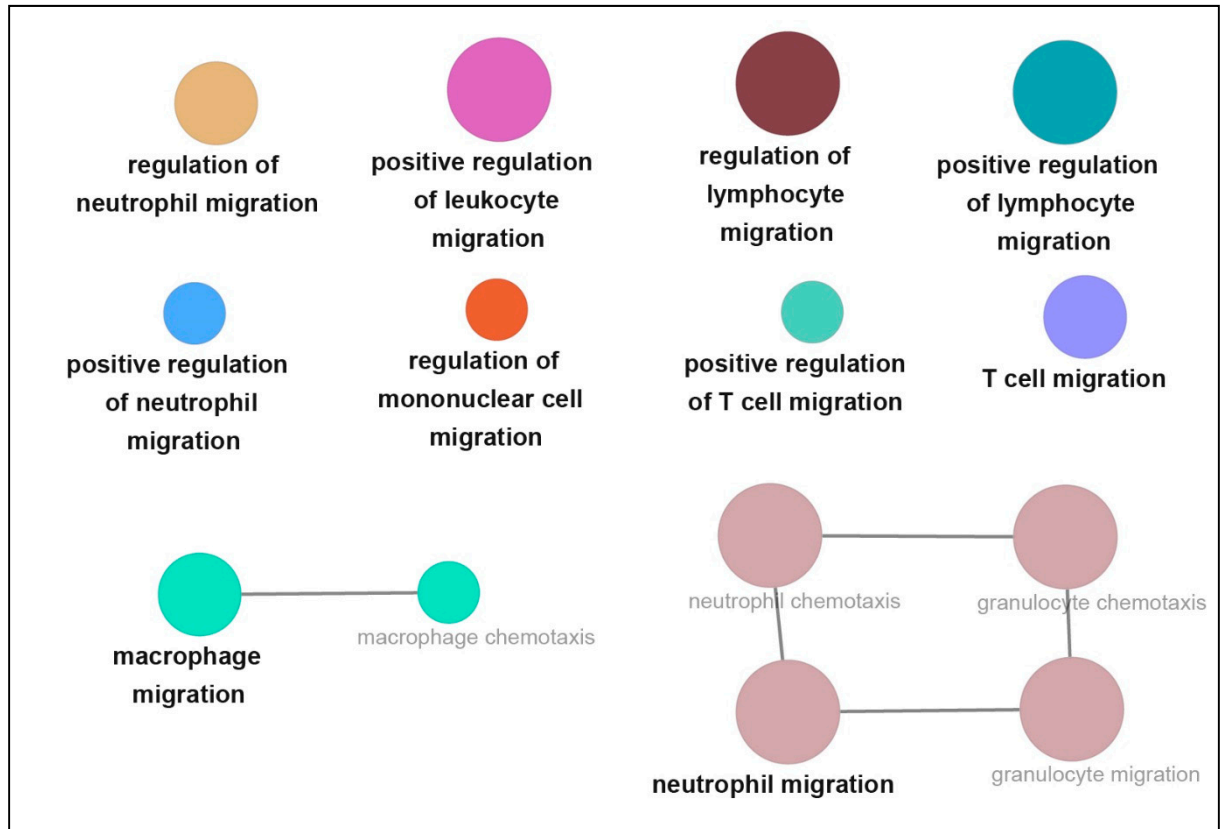

(F)

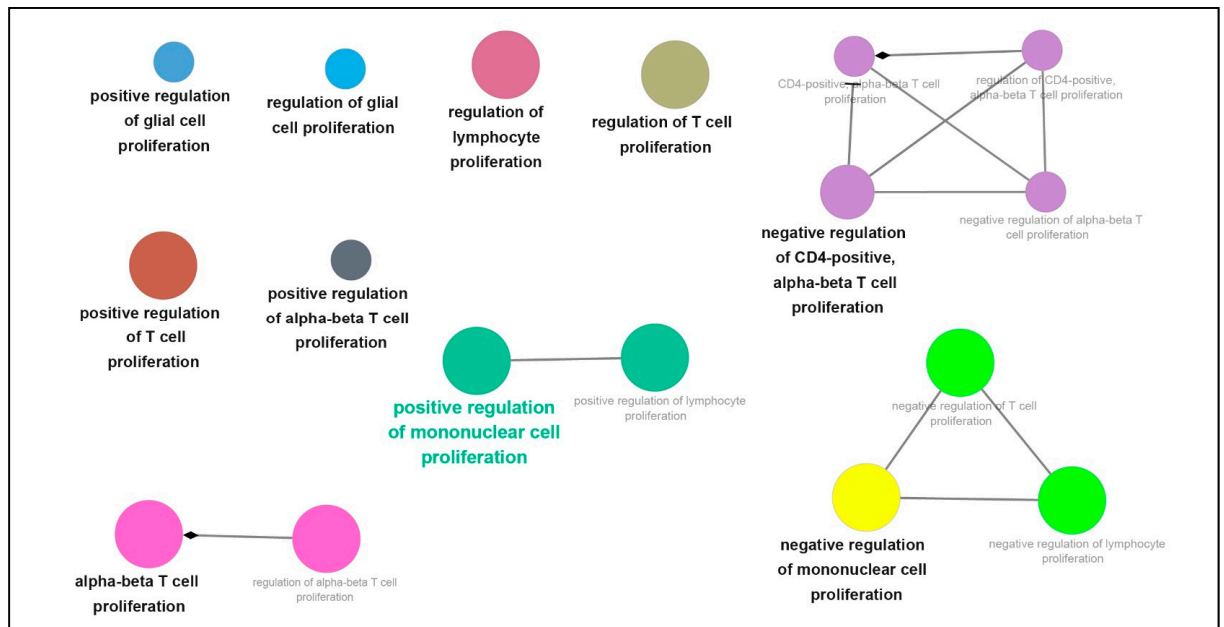

(G)

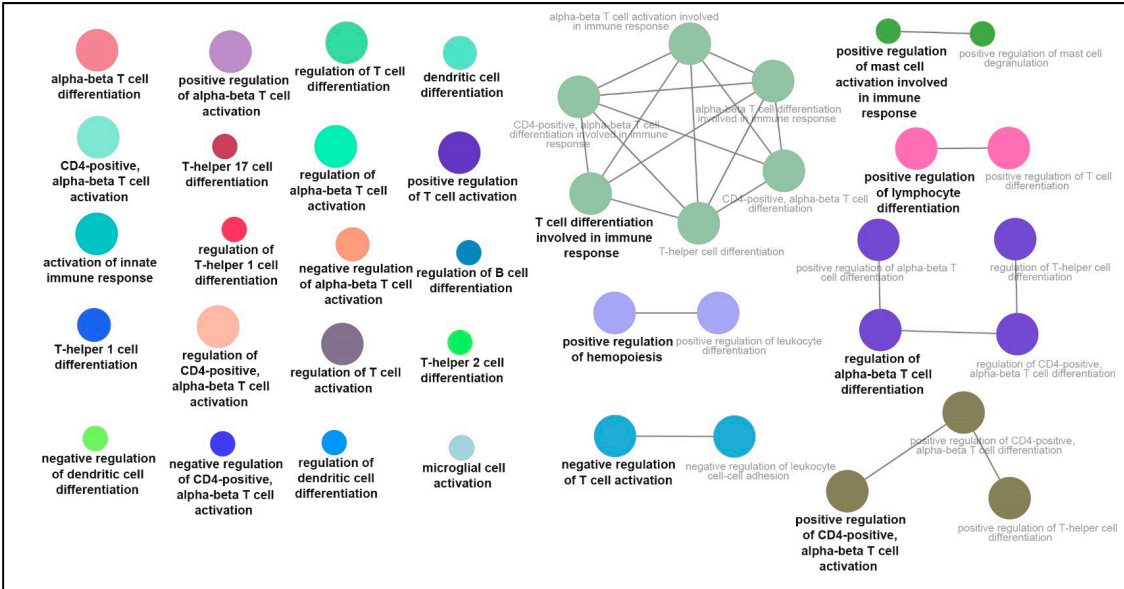

(H)

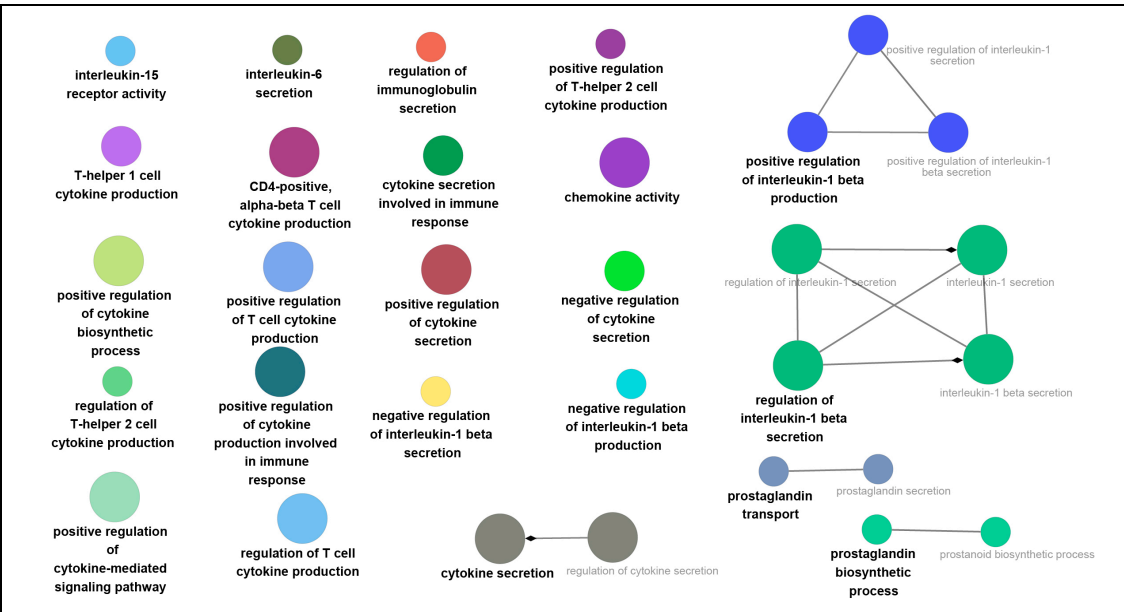

(I)

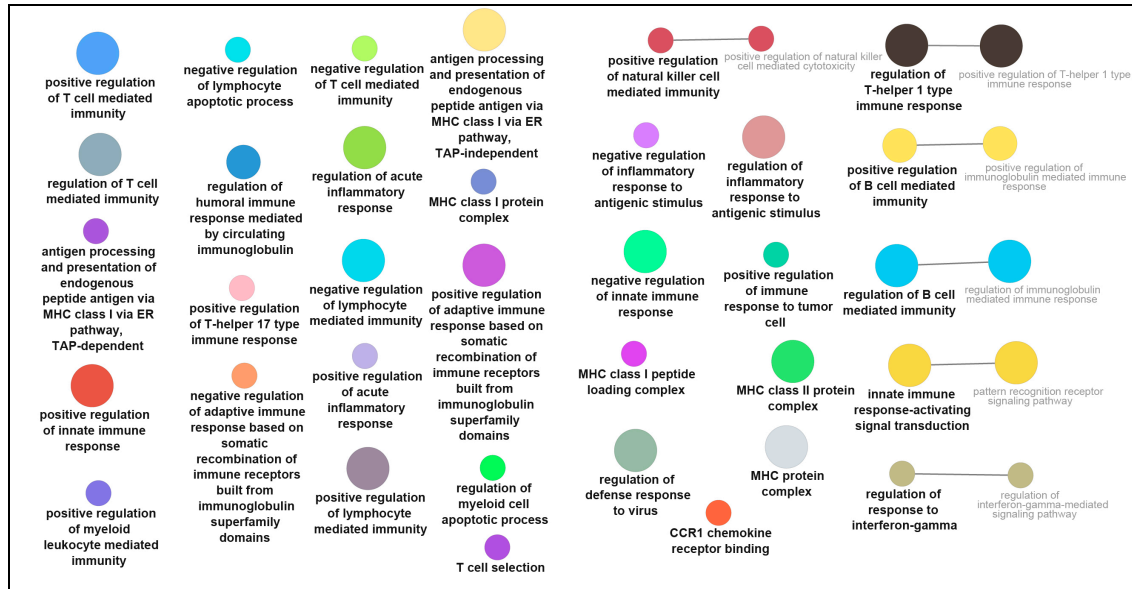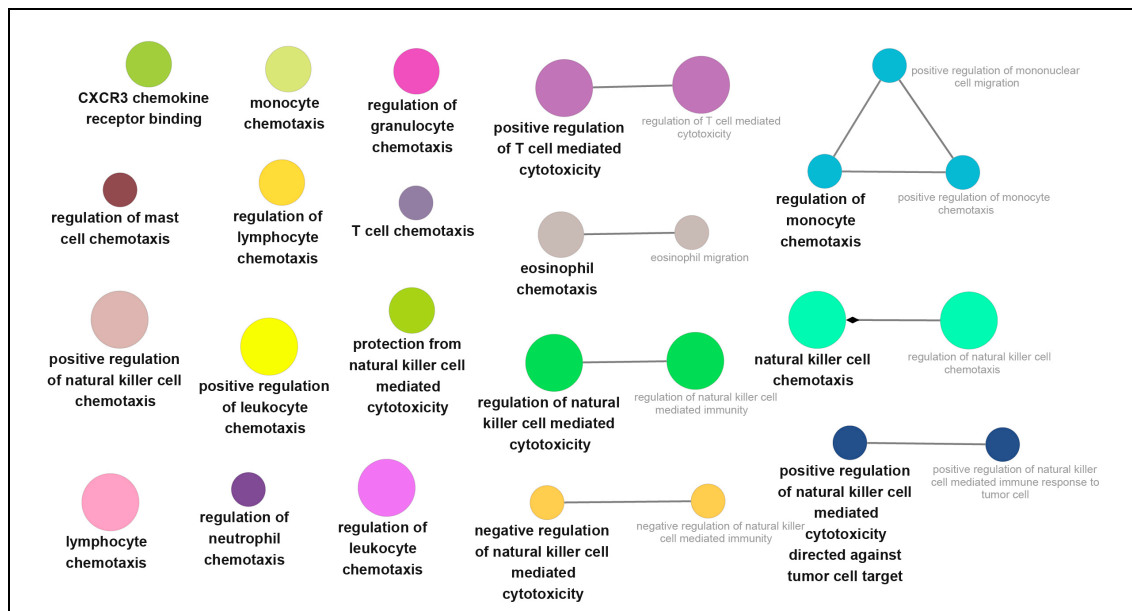

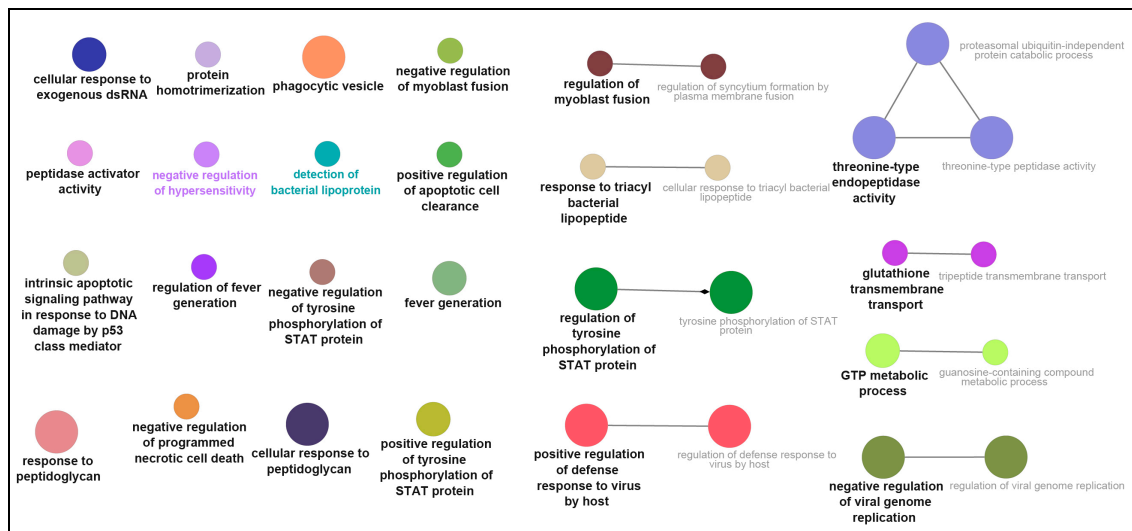

(L)

**Figure S3.** Functional enrichment analysis of up-regulated DEGs from ClueGO. (A) fatty acid metabolism; (B) nitric oxide production; (C) immune signaling pathways; (D) toll-like signaling pathways; (E) mitochondrial function; (F) proliferation of immune cells; (G) cell proliferation; (H) activation and differentiation of immune cells; (I) cytokine production or activity; (J) inflammation and immune activity; (K) chemotaxis and cototoxicity of immune cells; (L) other biological activities.
