# Supplementary material for: Transcriptomic Changes in Mouse Bone Marrow-Derived Macrophages Exposed to Neuropeptide FF
Source: MDPI journal article supplement (doi:10.3390/genes12050705), 2021-05-09
Supplement: s1 [file s1]

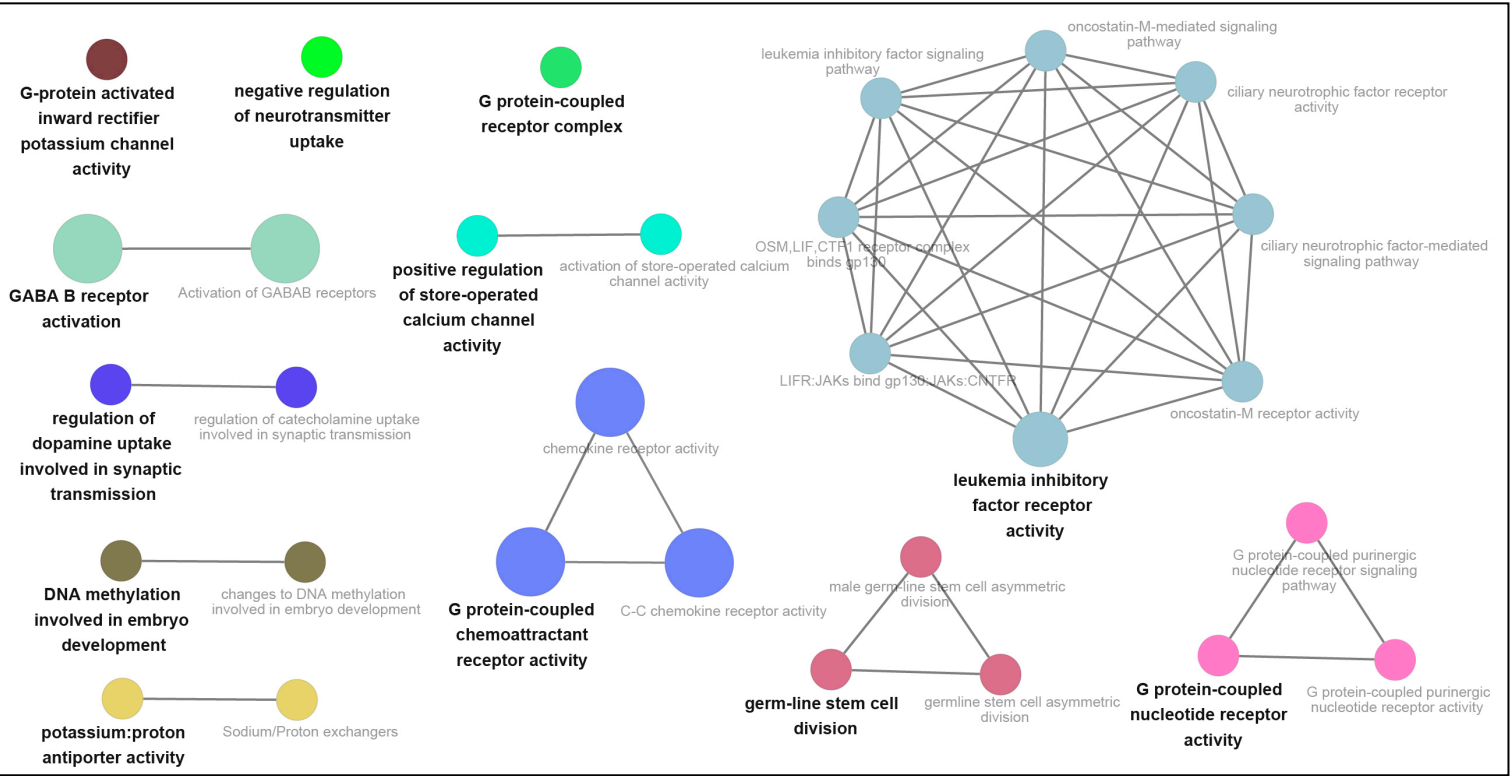

(C) GPCR and cell channel

**Figure S2.** Functional enrichment analysis of down-regulated DEGs from ClueGO. (A) cell migration; (B) signaling pathways, and (C) GPCR and cell channel activity.
