# Supplementary material for: Transcriptomic Changes in Mouse Bone Marrow-Derived Macrophages Exposed to Neuropeptide FF
Source: MDPI journal article supplement (doi:10.3390/genes12050705), 2021-05-09
Supplement: s1 [file s1]

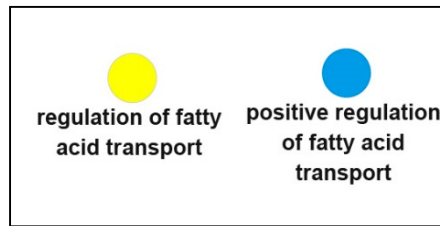

(A)

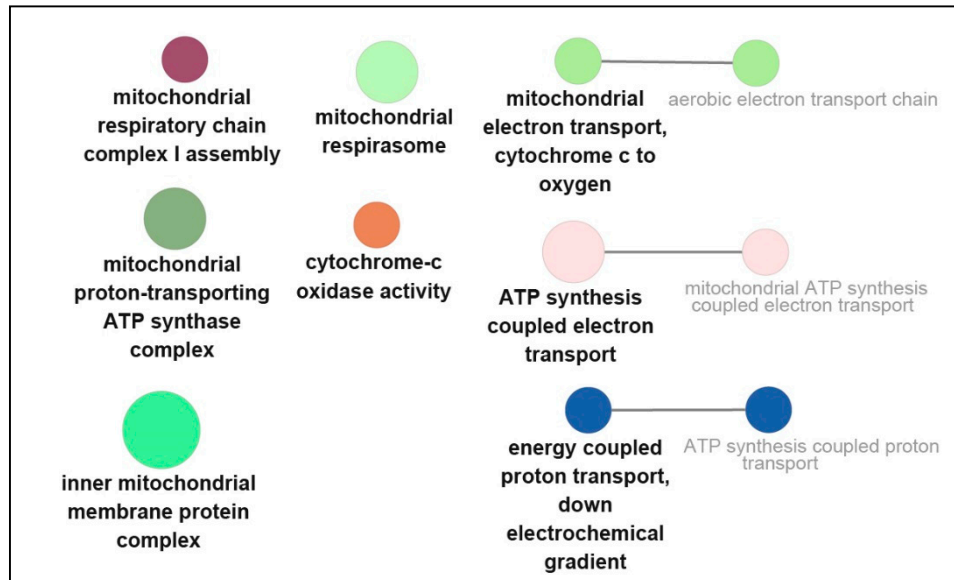

(B)

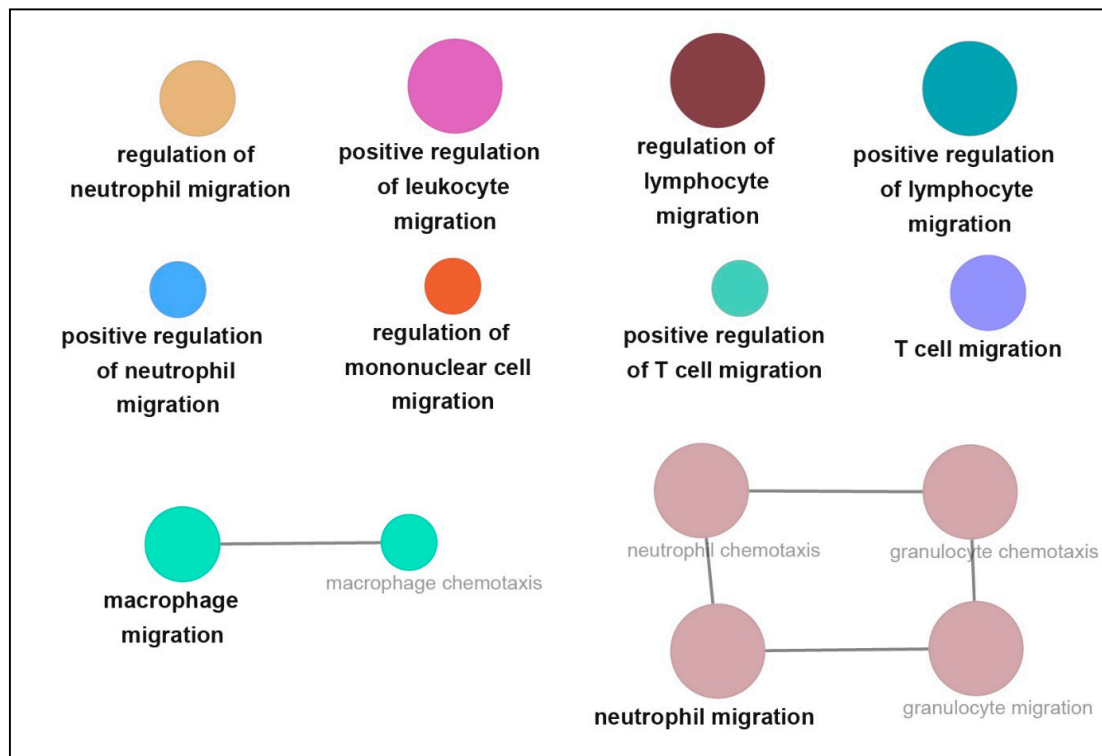

(C)

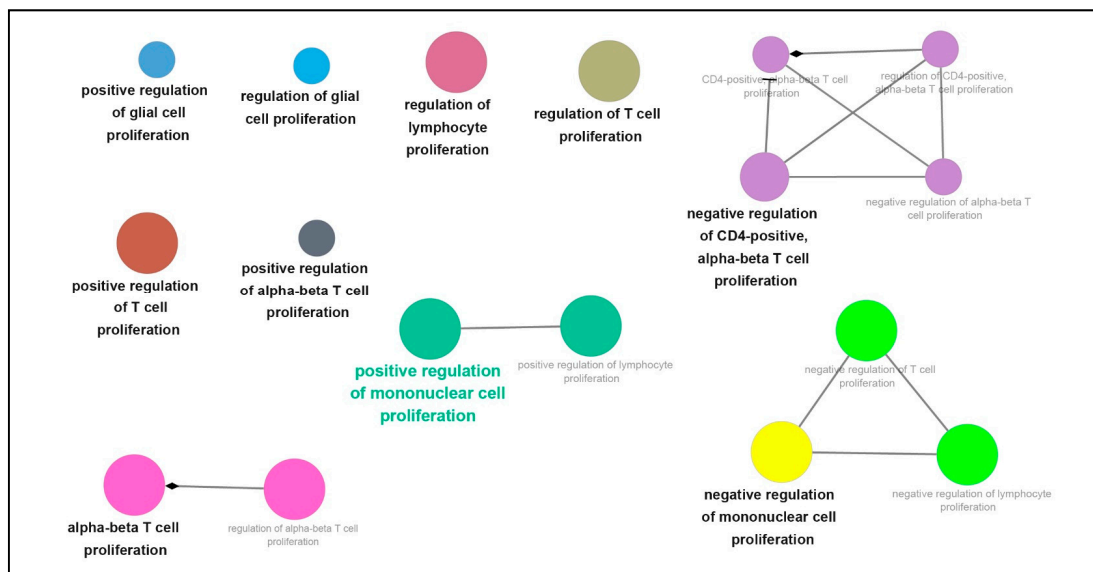

(D)

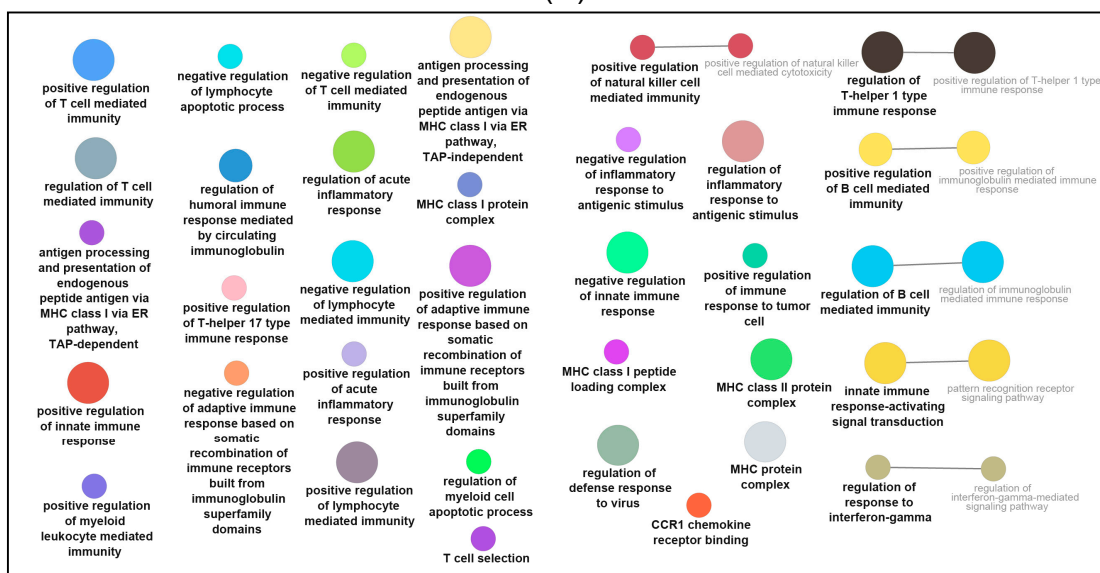

(E)

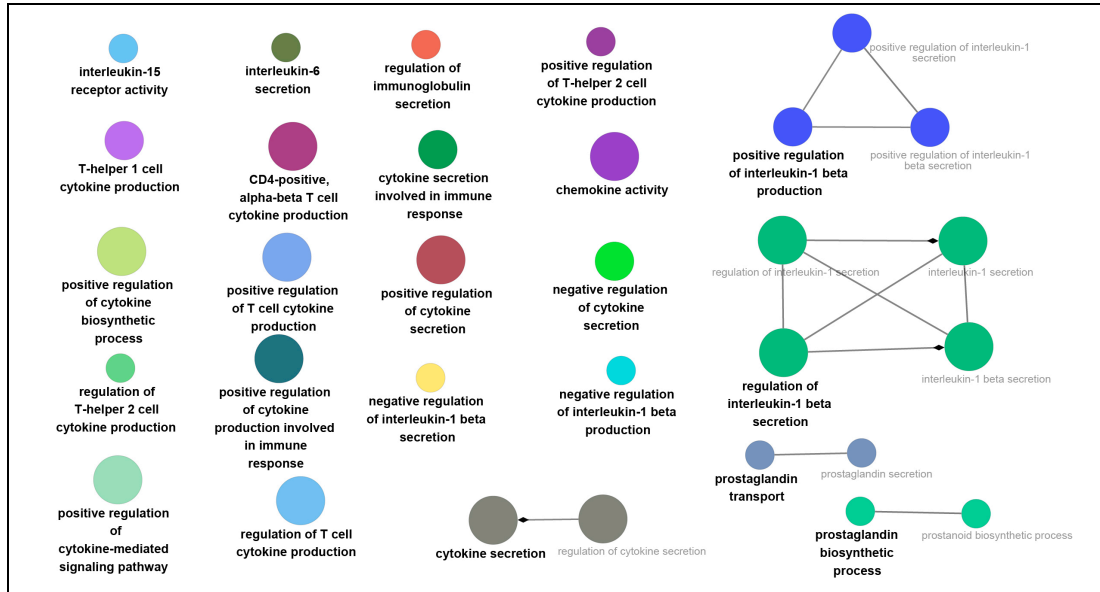

(F)

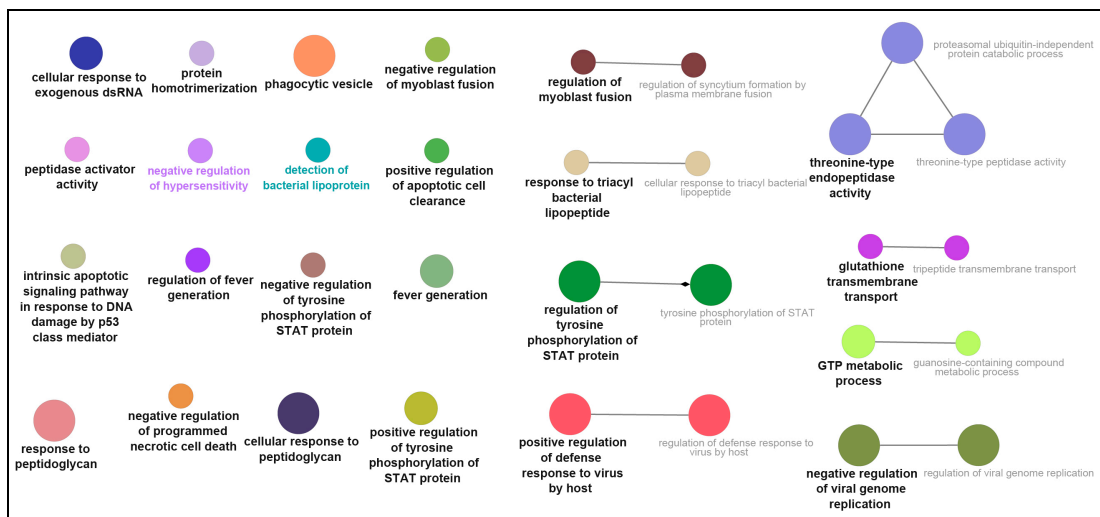

(G)

**Figure S3.** Functional enrichment analysis of up-regulated DEGs from ClueGO. (A) fatty acid metabolism; (B) mitochondrial function; (C) proliferation of immune cells; (D) cell proliferation; (E) cytokine production or activity; (F) inflammation and immune activity, and (G) other biological activities.
