# Supplementary material for: Transcriptomic Changes in Mouse Bone Marrow-Derived Macrophages Exposed to Neuropeptide FF
Source: MDPI journal article supplement (doi:10.3390/genes12050705), 2021-05-09
Supplement: s1 [file s1]

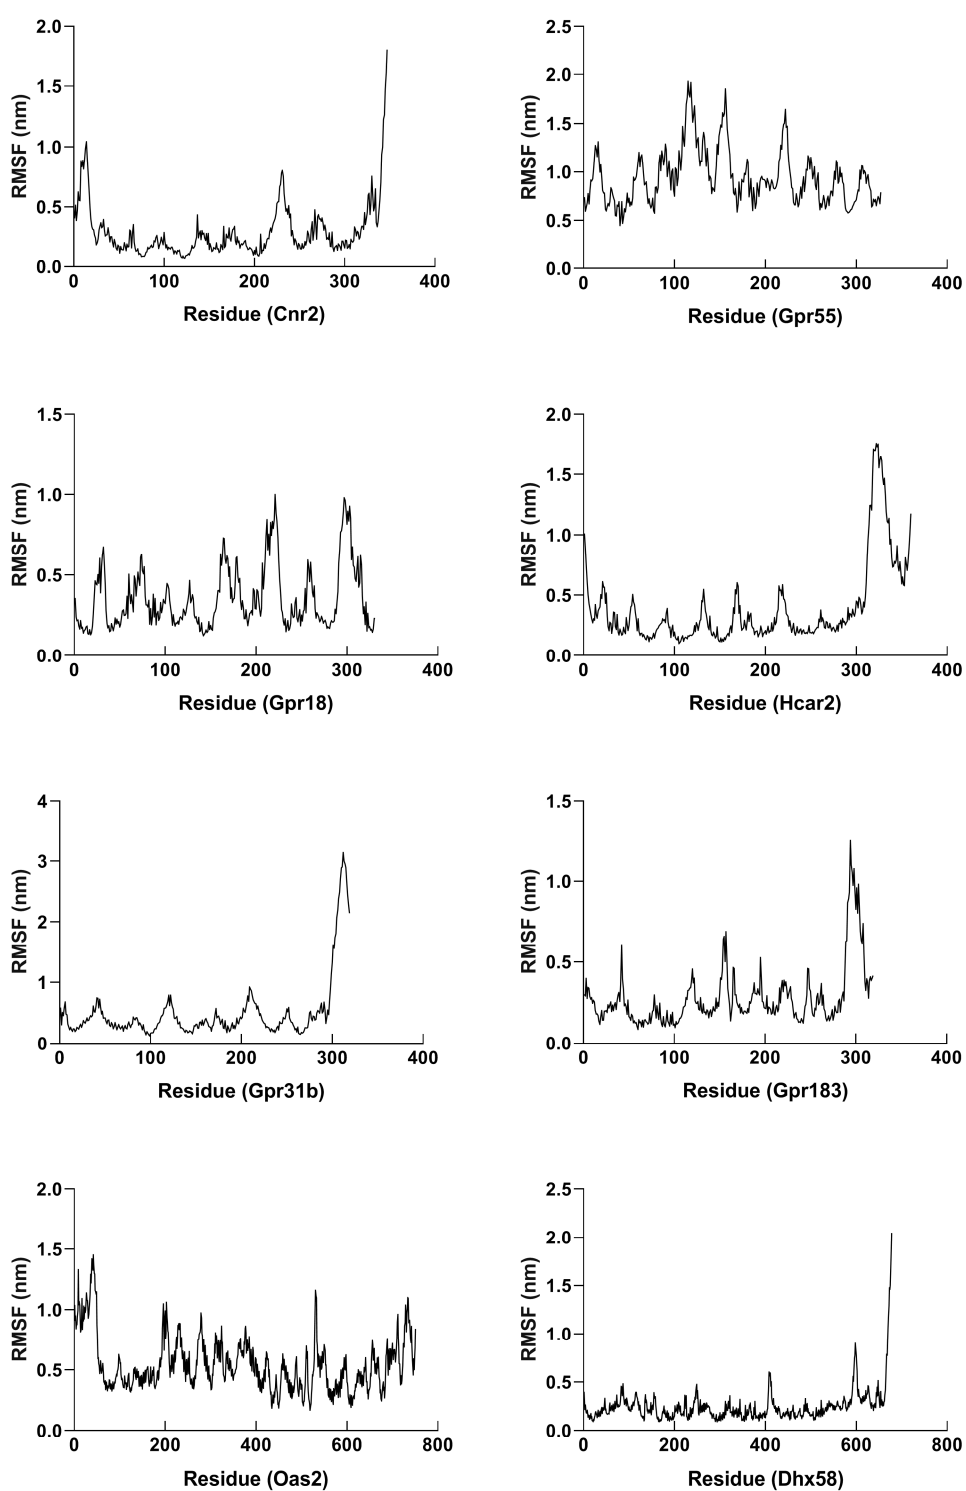

**Figure S7.** RMSF plots of hub proteins in molecular dynamics simulation. The RMSF of CNR2, GPR55, GPR18, HCAR2, GPR31B, GPR183, OAS2, and DHX58 were presented.
